# 1 Inter-species h-current differences 2 influence resonant properties in a 3 novel human cortical layer 5 neuron 4 model

5 **Scott Rich<sup>1, †</sup>, Homeira Moradi Chameh<sup>1, †</sup>, Vladislav Sekulic<sup>1, §</sup>, Frances K.  
6 Skinner<sup>1, 2, ‡</sup>, Taufik A. Valiante<sup>1, 3, 4, 5, 6 ‡</sup>**

\*For correspondence:  
[sbrich@umich.edu](mailto:sbrich@umich.edu) (SR)

<sup>†</sup>Shared first authors

<sup>‡</sup>Shared senior authors

Present address: <sup>§</sup>RIKEN, Japan

7 <sup>1</sup>Division of Clinical and Computational Neuroscience, Krembil Research Institute,  
8 University Health Network (UHN), Toronto, Ontario, Canada; <sup>2</sup>Departments of Medicine  
9 (Neurology) and Physiology, University of Toronto, Toronto, ON, Canada; <sup>3</sup>Institute of  
10 Biomaterials and Biomedical Engineering, University of Toronto, Toronto, ON, Canada;  
11 <sup>4</sup>Institute of Medical Science, University of Toronto, Toronto, ON, Canada; <sup>5</sup>Division of  
12 Neurosurgery, Department of Surgery, University of Toronto, Toronto, ON, Canada;  
13 <sup>6</sup>Electrical and Computer Engineering, University of Toronto, Toronto, ON, Canada

---

## 15 Abstract

16 Most existing multi-compartment, mammalian neuron models are built from rodent data. However,  
17 our increasing knowledge of differences between human and rodent neurons suggests that, to  
18 understand the cellular basis of human brain function, we should build models from human data.  
19 Here, we present the first full spiking, multi-compartment model of a human layer 5 cortical  
20 pyramidal neuron. Model development balanced prioritizing current clamp data from the neuron  
21 providing the model's morphology, while also ensuring the model's generalizability via preservation  
22 of spiking properties observed in a secondary population of neurons, by "cycling" between these  
23 data sets. The model was successfully validated against electrophysiological data not used in  
24 model development, including experimentally observed subthreshold resonance characteristics.  
25 Our model highlights kinetic differences in the h-current across species, with the unique  
26 relationship between the model and experimental data allowing for a detailed investigation of the  
27 relationship between the h-current and subthreshold resonance.

---

## 29 Introduction

30 Currently, much of what is understood about specific cell-types and their role in "computation"  
31 (*Womelsdorf et al., 2014*) within the six-layered neocortex stems from invasive and *in vitro* studies  
32 in rodents and non-human primates. Whether or not such principles can be extended to human  
33 neocortex remains speculative at best. Despite the significant transcriptomic convergence of  
34 human and mouse neurons (*Hodge et al., 2019*), significant differences between human and rodent  
35 cell-type properties exist. *In vitro* studies have identified differences between mouse and human  
36 neurons in morphology (*Mohan et al., 2015*), dendritic integration (*Beaulieu-Laroche et al., 2018*;  
37 *Eyal et al., 2016*), synaptic properties (*Verhoog et al., 2013*), and collective dynamics (*McGinn and*  
38 *Valiante, 2014*; *Molnár et al., 2008*; *Florez et al., 2013*). However, less explored are the active

39 membrane properties of human cortical neurons, which together with their passive and synaptic  
40 properties underlie oscillations which are of likely physiological relevance (*Akam and Kullmann,*  
41 *2014; Womelsdorf et al., 2014; Fries, 2005; Anastassiou et al., 2011; Hanslmayr et al., 2019; Vaz*  
42 *et al., 2019*).

43 Recently it has been shown that increased expression of hyperpolarization activated cation chan-  
44 nels (h-channels) contribute to the observed subthreshold resonance in supragranular layer human  
45 pyramidal cells not seen in their rodent counterparts (*Kalmbach et al., 2018*). Such differential  
46 expression of h-channels also appears to be present between superficial and deep layer neurons  
47 of human cortex, with layer 5 (L5) pyramidal cells demonstrating a larger sag voltage mediated  
48 by the current through these channels (dubbed the “h-current”) when compared to those in layer  
49 2/3 (L2/3) (*Chameh et al., 2019*). However, despite the presence of large sag currents in human  
50 L5 pyramidal cells, they do not display subthreshold resonance (*Chameh et al., 2019*), a surprising  
51 result based upon recent human work (*Kalmbach et al., 2018*) as well as findings that rodent L5  
52 pyramidal cells exhibit subthreshold resonance (*Silva et al., 1991; Ulrich, 2002; Dembrow et al.,*  
53 *2010; Schmidt et al., 2016*).

54 To explore this seeming inconsistency, a combination of computational and experimental  
55 techniques are employed to create a novel human neuron model with a particular focus on the  
56 h-current. The development of computational models of human neurons with high levels of  
57 biophysical detail are more challenging than their rodent counterparts due to limited access to  
58 tissue for experimental recordings. This challenge is exacerbated by the fact that to model how  
59 a specific channel contributes to cellular dynamics, it is typically necessary to obtain a complete  
60 data set (including whole-cell recordings in current and voltage clamp modes, pharmacological  
61 manipulations, and 3D morphology) all in the same neuron. The increased access to rodent tissue  
62 makes accounting for these concerns more feasible in the rodent setting, and explains why a  
63 majority of the existing biophysically detailed neuron models are constrained by rodent data (*Dong,*  
64 *2008; Jones et al., 2009; Sunkin et al., 2012*). Nonetheless, the clear differences between human  
65 and rodent neurons (*Hodge et al., 2019; Eyal et al., 2018, 2016; Testa-Silva et al., 2014; Verhoog*  
66 *et al., 2013; Beaulieu-Laroche et al., 2018*) leads to two important questions for computational  
67 neuroscientists: in what settings is it appropriate to utilize rodent neuron models to glean insights  
68 into the human brain, and when such approximations are undermined by inter-species differences,  
69 can the functional role of these differences be identified?

70 We address these questions via a modeling framework that makes use of a detailed data  
71 set obtained from a single human L5 neuron. We are motivated by the clear preponderance  
72 of the h-current in human L5 neurons (*Chameh et al., 2019*), their complex role in regulating  
73 neuronal excitability (*Dyhrfeld-Johnsen et al., 2009; Biel et al., 2009*), their hypothesized role in  
74 driving subthreshold resonance (*Kalmbach et al., 2018; Hu et al., 2002, 2009; Zemankovics et al.,*  
75 *2010; Ulrich, 2002*), and towards developing human inspired neuronal models for brain simulators  
76 (*Einevoll et al., 2019*).

77 Since it is clear that the characteristics of a given cell type are not fixed (*Marder and Goaillard,*  
78 *2006*), and moreover that this inherent variability amongst similarly classified cells could be func-  
79 tionally important (*Wilson, 2010*), we develop a modeling approach that directly accounts for the  
80 challenge posed to modelers by such “cell-to-cell variability”. Our “cycling” model development  
81 strategy primarily constrains the model using current clamp data and morphology from the same  
82 neuron. In a second step, we ensure the model retains spiking characteristics exhibited by a popu-  
83 lation of secondary human cortical L5 pyramidal neurons; the process cycles between these two  
84 steps to obtain an optimal model. The resulting multi-compartment, fully spiking human L5 neuron  
85 model recapitulates the electrophysiological data from hyperpolarizing current clamp experiments  
86 in the primary cell remarkably well, while also demonstrating repetitive and post-inhibitory rebound  
87 spiking properties characteristic of human L5 pyramidal cells from the secondary data set (*Chameh*  
88 *et al., 2019*).

89 A key aspect of our approach was to “fit” the h-current kinetics to the current clamp data,

90 which was then validated by comparing the kinetics of our current clamp derived “human” h-current  
91 model to experimentally-derived kinetics from voltage clamp data not used as a modeling constraint.  
92 These kinetics are distinct from those observed in rodents and implemented in many rodent cortical  
93 pyramidal cell models (*Kole et al., 2006*). With the model validated, a detailed investigation into the  
94 generation of subthreshold resonance in these cells reveals that the unique kinetics of the human  
95 h-current we describe here explain the lack of resonance seen in human L5 pyramidal cells (and  
96 replicated by our model) despite the abundance of these channels (*Chameh et al., 2019*). Taken  
97 together, our model predictions are validated against data from the primary neuron not used in  
98 model generation, as well as against data from a larger cohort of many additional human L5 cortical  
99 pyramidal cells (*Chameh et al., 2019*), including complex subthreshold dynamics exemplified by the  
100 lack of resonance.

101 In summary, our findings reveal that there are important differences in dynamics of the h-  
102 current in human L5 pyramidal neurons, when compared to their rodent counterparts, that obviate  
103 subthreshold resonance at resting membrane potential despite the presence of large sag currents.  
104 Given the numerous ways in which the validity of the model used in this investigation are confirmed,  
105 this technique is likely more generally applicable to other modeling endeavors. Critically, this  
106 publicly available cell model represents the first biophysically detailed, multi-compartment human  
107 L5 pyramidal model with active dendrites that can be used and modified to investigate distinctly  
108 human neural dynamics.

## 109 Results

### 110 Development of a human L5 cortical pyramidal cell model using a cycling fitting 111 strategy

112 In developing models of a given cell type it is preferable to use data from the same cell, as averaging  
113 experimental data from multiple cells in order to create computational models has been shown  
114 to be problematic due to cell-to-cell variability (*Golowasch et al., 2002*). Indeed, multiple studies  
115 have shown significant variability in conductance densities between similarly classified neurons  
116 (*Goaillard et al., 2009; Ransdell et al., 2013*). However, obtaining the full suite of data necessary  
117 to completely characterize all the different ion channel types individually is not possible in an  
118 individual neuron given experimental constraints (a discussion of these limitations is included in  
119 the Materials and Methods). This is additionally challenging when building human cellular models  
120 due to limited tissue access.

121 Given these considerations, we developed a “cycling” fitting methodology (inspired in part by the  
122 “divide and conquer” strategy proposed by *Roth and Bahl (2009)*) to best utilize our unique human  
123 data set to build our model. Two distinct sets of data were utilized: data from our primary neuron,  
124 from which detailed morphology and electrophysiological recordings in the presence of tetrodotoxin  
125 (TTX, which blocks voltage-gated sodium channels and in turn action potential generation) were  
126 obtained, shown in Figure 1; and data from a suite of secondary neurons, not treated with TTX, that  
127 yielded spiking characteristics (*Chameh et al., 2019*).

128 Our model generation process began with a reconstruction of the primary neuron’s cellular  
129 morphology, illustrated in Figure 1, and implementation of this reconstruction in the NEURON  
130 simulation environment (*Carnevale and Hines, 2006*). In the absence of any other specific knowl-  
131 edge of the human setting, we included ten different types of ion channels that were used in  
132 developing rodent L5 pyramidal cell models (*Hay et al., 2011*). They include the following: a fast,  
133 inactivating sodium current (abbreviated Na\_Ta); a persistent sodium current (abbreviated Nap\_Et2);  
134 a slow, inactivating potassium current (abbreviated K\_Pst); a fast, non-inactivating potassium cur-  
135 rent (abbreviated SKv3\_1); a small-conductance calcium activated potassium current (abbreviated  
136 SK\_E2); a fast, inactivating potassium current (abbreviated K\_Tst); a low-voltage activated calcium  
137 current (abbreviated Ca\_LVA); a high-voltage activated calcium current (abbreviated Ca\_HVA); the  
138 non-specific hyperpolarization-activated cation current (abbreviated Ih); and the voltage-gated mus-

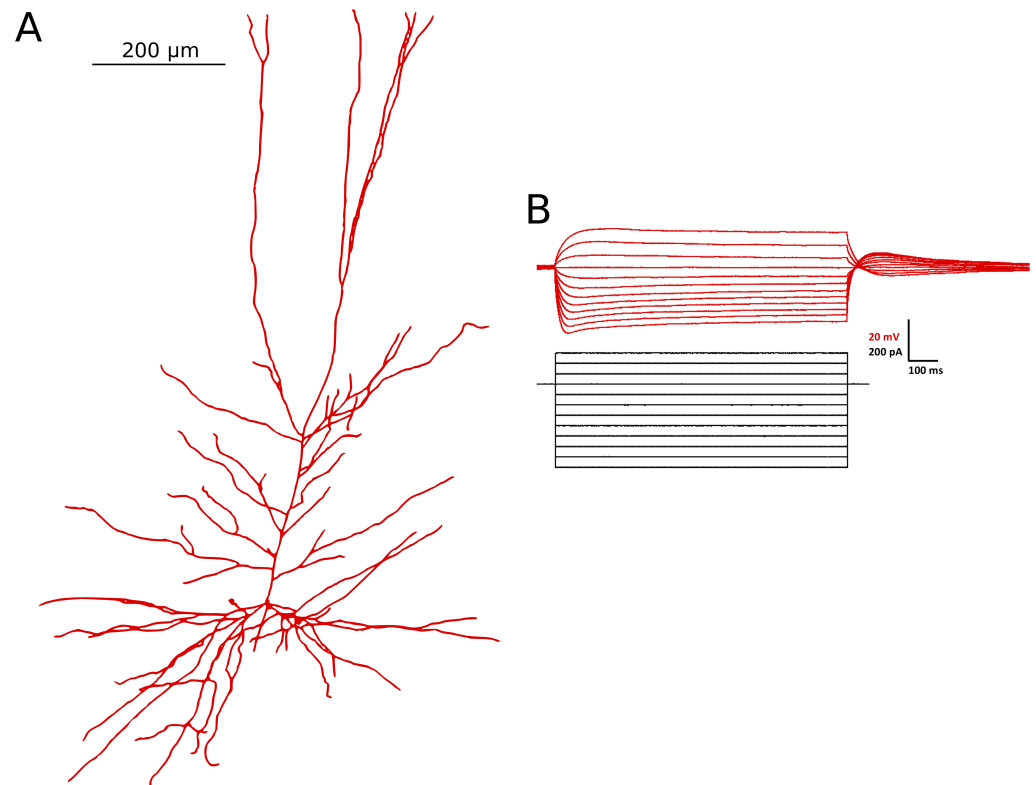

**Figure 1. Morphology and current clamp data obtained from the primary neuron. (A)** The morphology of the primary neuron was reconstructed using IMARIS software and imported into NEURON (which generated the plot shown here). **(B)** Current clamp recordings from the primary neuron in the presence of TTX that are the primary constraining data for model development.

139 carinic potassium channel (abbreviated  $I_m$ ). Note that the abbreviations used here are motivated  
140 by the labeling used in the NEURON code for consistency. This provided the initial basis for our  
141 model construction, with further details included in the Materials and Methods.

142 The “cycling” technique schematized in Figure 2 built upon this basis. In the first step, an  
143 optimization algorithm was run to best “fit” the model’s output with blocked sodium channels  
144 to experimental data from current clamp recordings in the presence of TTX (see Figure 1). This  
145 determined a majority of the conductances used in the model, as well as the passive properties  
146 and the kinetics of the h-current. As the h-current is the primarily active inward current at hyper-  
147 polarized voltages (Toledo-Rodriguez *et al.*, 2004; Hay *et al.*, 2011), we focused on it by emphasizing  
148 hyperpolarizing current clamp traces in our fitting and by optimizing both the conductance and  
149 kinetics of this channel type.

150 In the second step, after a best fit was achieved, we hand tuned the conductances involved in  
151 action potential firing (sodium conductances and the  $K_{Pst}$  and  $SKv3\_1$  potassium conductances,  
152 which were not altered in the preceding step), along with minor alterations to the dynamics of these  
153 channels (see details in the Materials and Methods). The goal of this step was to ensure the spiking  
154 behavior of our model cell was reasonable in comparison to the range of spiking properties, both of  
155 repetitive and post-inhibitory rebound (PIR) firing, exhibited by secondary human L5 pyramidal cells  
156 (summarized in Table 1 (Chameh *et al.*, 2019)). We aimed to obtain these firing characteristics with  
157 minimal potassium conductances, in order to minimize the error seen in Figure 3E: an extensive  
158 exploration of the parameter space revealed that a “best fit” of this trace would enforce values of  
159 the potassium conductances that would not permit action potential firing, motivating the hand  
160 tuning of these values in search of a set of sodium and potassium conductance values that would  
161 permit spiking while also minimizing this error. As the properties of these potassium channels

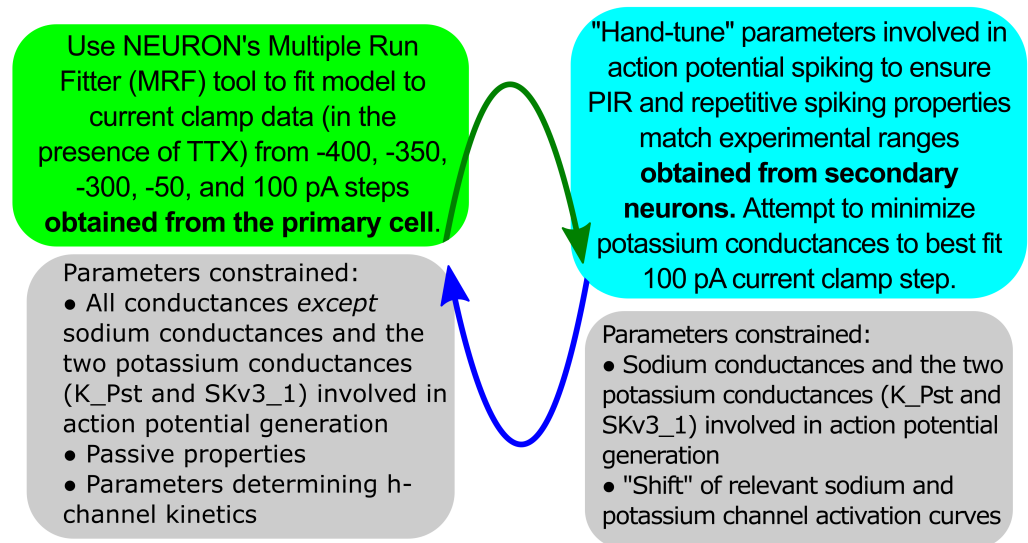

**Figure 2. Diagram of the model development strategy.** Hyperpolarizing current clamp data taken from the primary human L5 pyramidal cell was the primary constraint in determining model parameters. To ensure that the model exhibited repetitive and post-inhibitory rebound firing dynamics characteristic of human L5 pyramidal cells, data from secondary neurons, as well as best fit data from depolarizing current clamp experiments in the primary cell were used, and a “cycling” technique was developed in which conductances primarily active during spiking dynamics were fit separately by hand. The adjustments to the potassium conductances affect the current clamp fits, so these were re-run with the new values, hence the “cycle”.

162 affected the current clamp fits, it was then necessary to run the optimization algorithm of the first  
 163 step again with these new values, hence the “cycling”. This cycling pattern continued until no further  
 164 improvement in the model, as determined via the quantitative error score from the optimization  
 165 process as well as the more qualitative matching of spiking properties, could be obtained (see the  
 166 Materials and Methods for further details).

**Table 1.** Properties of repetitive and post-inhibitory rebound (PIR) spiking observed experimentally in secondary population of human L5 pyramidal neurons compared to the model

|                                                        | Mean ± STD<br>Experimental | Maximum<br>Experimental | Minimum<br>Experimental | Model |
|--------------------------------------------------------|----------------------------|-------------------------|-------------------------|-------|
| <b>Spiking Rate (Hz)<br/>50 pA current step</b>        | 2.5 ± 1.6                  | 5.0                     | 1.6                     | 17.9  |
| <b>Spiking Rate (Hz)<br/>100 pA current step</b>       | 7.5 ± 8.3                  | 45.0                    | 1.7                     | 37.0  |
| <b>Spiking Rate (Hz)<br/>300 pA current step</b>       | 63.3 ± 51.9                | 211.7                   | 11.7                    | 71.4  |
| <b>PIR Spike Latency (ms)<br/>-400 pA current step</b> | 95 ± 70                    | 250                     | 5.1                     | 75    |
| <b>PIR Spike Latency (ms)<br/>-350 pA current step</b> | 85 ± 60                    | 230                     | 5.4                     | 87    |
| <b>PIR Spike Latency (ms)<br/>-300 pA current step</b> | 96 ± 70                    | 250                     | 5.7                     | 110   |

167 The output of our final model in response to the various current clamp protocols with blocked  
 168 sodium channels, compared to what was observed experimentally in the primary neuron, is shown  
 169 in Figure 3A-E. The repetitive spiking behavior of the model in response to various driving currents is  
 170 shown in Figure 4A-C, and the capacity for PIR spiking is shown in Figure 4D; both of these protocols

171 are performed with active sodium channels. The repetitive firing frequency or latency to the first  
172 PIR spike (depending upon whether the protocol is a depolarizing or hyperpolarizing current clamp,  
173 respectively), is given in Table 1. Critically, the model closely matches all of the hyperpolarizing  
174 current clamp data, indicating that the dynamics of the h-current within this voltage range were  
175 accurately encapsulated by our model. While the error in the depolarizing current clamp recording  
176 (Figure 3E) is more noticeable, this was minimized via the process described above, and was the  
177 best case while also ensuring reasonable repetitive spiking and PIR spiking behaviors (Figure 4 and  
178 Table 1).

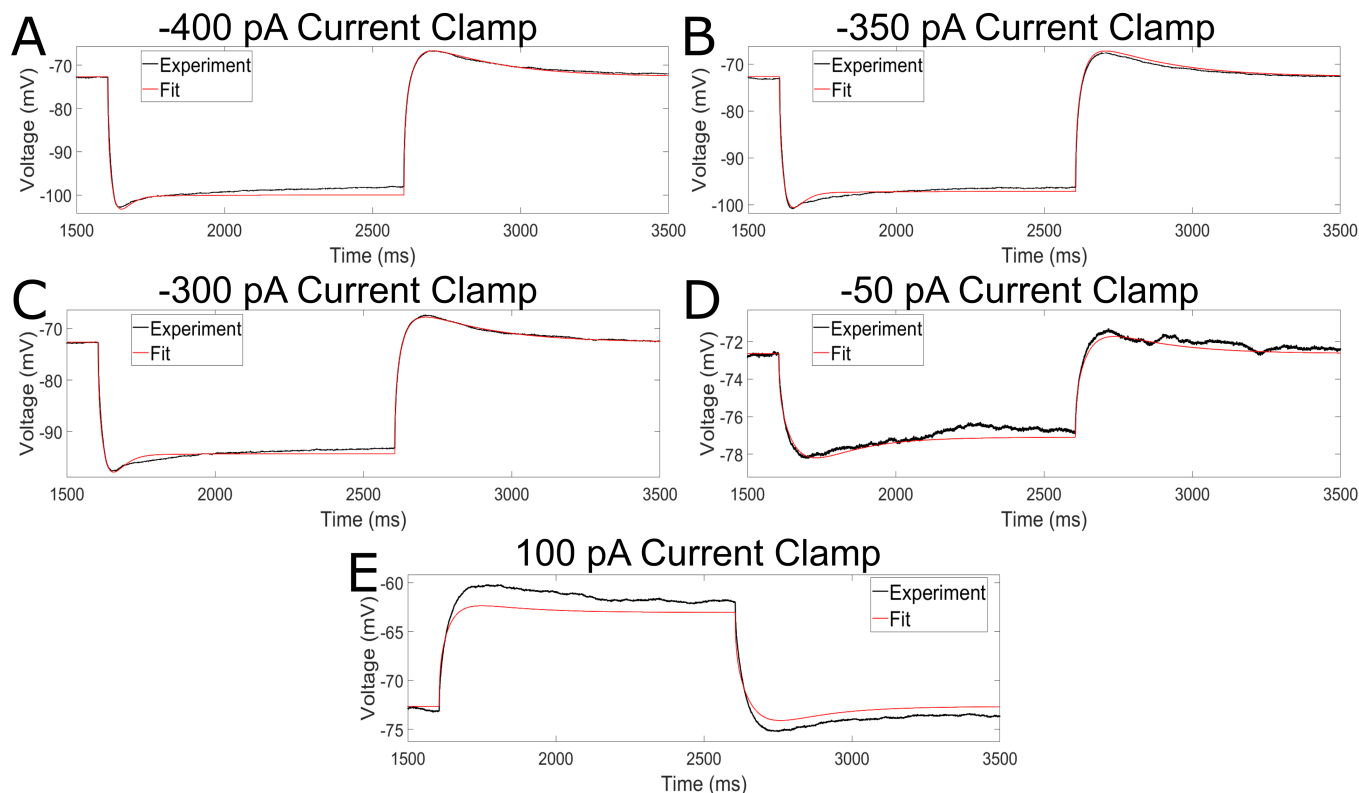

**Figure 3. Model well fits data from hyperpolarizing current steps, in which the h-current is the primary active channel, while minimizing the error seen in a depolarizing current step. (A-D)** Fits of current clamp data with -400 pA (A), -350 pA (B), -300 pA (C) and -50 pA (D) current steps with TTX. (E) Fit of current clamp data with a depolarizing current step of 100 pA with TTX. All four hyperpolarized current steps are fit with great accuracy, with a focus on the initial “sag” and post-inhibitory “rebound” that are driven by the activity of the h-current. While the charging and discharging portion of the depolarizing current trace is well fit, the amplitude of the response is less accurate; however, this error was deemed reasonable given the emphasis in model development on capturing h-current dynamics, including PIR spiking, as discussed in detail in the text.

179 Indeed, the repetitive spiking frequencies and latencies to the first PIR spike highlighted in Table  
180 1 all fall within the range exhibited by the experimental data (see the maximum and minimum  
181 experimental values in Table 1), with the exception being the 50 pA current input resulting in faster  
182 spiking in our model than seen experimentally. This is likely a side effect of the “shift” in the sodium  
183 activation curves that, along with matching h-current features, was necessary to elicit PIR spiking in  
184 the model (described in detail in the Materials and Methods). Matching PIR behavior was deemed  
185 critical in this modeling endeavor given that the h-current is implicated in dictating this behavior  
186 (Chameh *et al.*, 2019). Indeed, the areas in which the model does not match the experimental  
187 data with the same level of accuracy as elsewhere are reasonable given the focus of the model on  
188 h-current driven dynamics, which are observed primarily in the fit to the hyperpolarizing current  
189 steps and the ability of the model to exhibit PIR spiking.

190 Our assertion that this model is appropriate for use in settings beyond those directly constraining

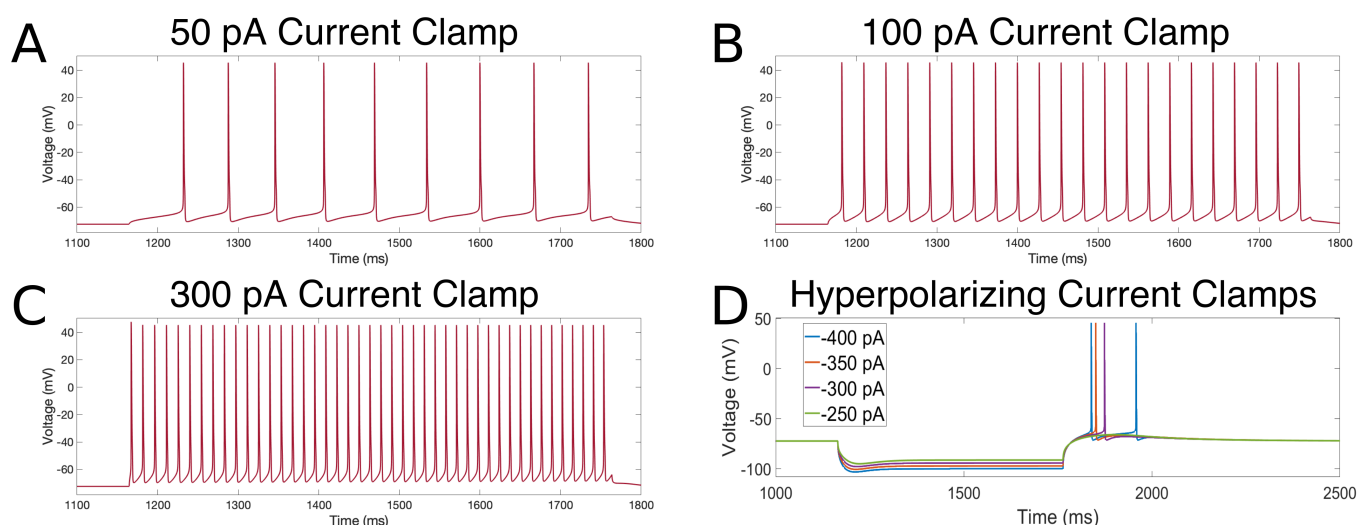

**Figure 4. Model neuron exhibits reasonable repetitive and PIR spiking behavior.** (A-C) Repetitive spiking behavior of the model neuron in response to a 50 pA (A), 100 pA (B), and 300 pA (C) current clamp steps. (D) PIR behavior in response to four hyperpolarizing current injections..

191 model generation requires additional evidence. Indeed, we must rule out the possibilities that  
192 we accidentally “overfit” our model to the chosen constraining data, or that this chosen data was  
193 somehow idiosyncratic and not indicative of the general properties and dynamics of the primary  
194 neuron and human L5 cortical pyramidal cells generally. We accomplish this task in three ways:  
195 first, by testing the model against secondary current clamp data obtained from the primary neuron  
196 but not used in model development (below); second, by comparing the dynamics of the modeled  
197 human h-current to those observed experimentally in the primary neuron (in the following section);  
198 and third, by comparing the model’s capacity for subthreshold resonance with that observed  
199 experimentally in human L5 cortical pyramidal neurons generally (in the following section).

200 Figure 5 illustrates the output of the model with four hyperpolarizing current injections, in  
201 comparison to the experimentally observed output from primary cell, that were not directly “fit” in  
202 model generation. We again focus on hyperpolarizing current steps given the focus on the h-current,  
203 which is activated at hyperpolarized voltages, in this endeavor. The strong correspondence between  
204 the model and the experimental data illustrates that the modeling process described here does  
205 indeed capture the general behavior of the primary cell in response to hyperpolarizing current steps  
206 of varying amplitudes. Perhaps most importantly, in all four cases the features of the trace most  
207 prominently influenced by the h-current, the initial “sag” following the onset of the hyperpolarizing  
208 current step and the “rebound” following its release, remain reasonably approximated by the model.

209 This result is a straightforward way of assessing our model’s validity via its ability to well match  
210 additional current clamp traces from the primary cell. Furthermore, considering the h-current’s  
211 dominance over the neuron’s dynamics at these hyperpolarized voltages, this result also provides  
212 early support for our assertion that our model captures the dynamics of the h-current. We more  
213 directly validate this assertion via the kinetics of the h-current and one important functional  
214 implication of these kinetics, subthreshold resonance, in the following section.

### 215 **Model replicates h-current kinetics and subthreshold resonance features observed** 216 **experimentally**

217 The distinct kinetics of the human h-current model from those of the rodent model of *Kole et al.*  
218 (2006) were paramount in facilitating the accurate fits of the *in silico* model (see Figure 3) to the  
219 *in vitro* experimental data presented in Figure 1. Such dynamics were constrained solely via the  
220 optimization technique summarized above. With these fits in hand alongside the presence of  
221 additional experimental data, namely voltage clamp recordings from both the primary neuron and

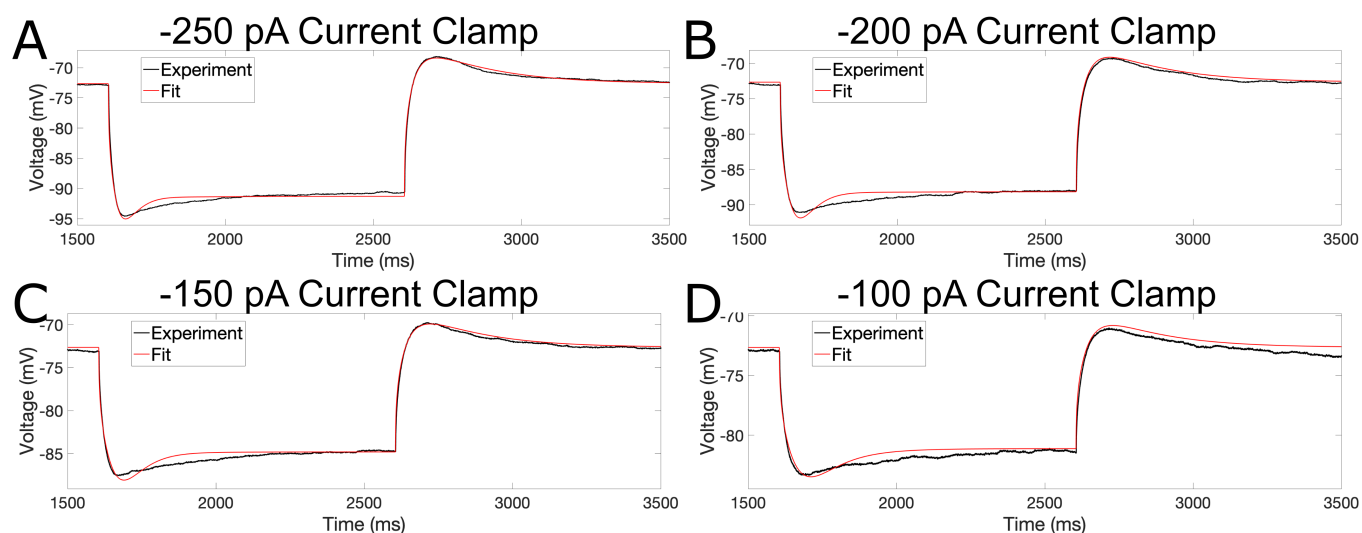

**Figure 5. Model output well-matches experimental data not used as constraints in model generation. (A-D)** Voltage traces from current clamp experiments with blocked voltage-gated sodium channels for steps of -250 pA (A), -200 pA (B), -150 pA (C) and -100 pA (D). Model output (red curve) well matches the experimental observations (black curve) despite these traces not being used in model generation.

222 secondary human L5 cortical pyramidal cells (described in detail in the Materials and Methods),  
223 approximate experimental values of the voltage dependence of the time constant (denoted  $\tau$ ) and  
224 the steady-state activation values of the h-current are obtained and compared with the h-current  
225 model derived from our modeling process.

226 In Figure 6 we present a comparison of the experimental values of these quantities, alongside  
227 the human h-current model as well as the model of *Kole et al. (2006)* that was used by *Hay et al.*  
228 *(2011)*. Given space-clamp issues associated with voltage clamp recordings, along with the fact  
229 that these recordings are somatic and h-channels are distributed throughout the dendrites both  
230 biologically and in our model, we would not expect our model to perfectly match this experimental  
231 data. However, it is apparent that our human h-current model is a better approximation of the  
232 experimental data, in particular that associated with the primary neuron, than the rodent h-current  
233 model. This is especially apparent for the voltage dependence of the time constant. We emphasize  
234 that the experimental voltage clamp data is *only* used for model validation, *not* for model creation,  
235 in order to maintain a self-consistent modeling strategy (a choice that is elaborated on in the  
236 Materials and Methods).

237 We note that, based upon the current clamp data for which the human h-current model  
238 parameters were derived, it would be expected that the best fit to the experimentally observed  
239 kinetics obtained from the voltage clamp data would be in a voltage range of -90 to -60 mV (which  
240 notably includes the cell's resting membrane potential), as this is the range at which a majority of  
241 the constraining current clamp data lies: because the current clamp data never achieves extreme  
242 hyperpolarized values (i.e. well past -100 mV), there is minimal constraint on the model at these  
243 voltages. This serves to explain why the  $\tau$  values of the human h-current approach zero much  
244 quicker for voltages in this hyperpolarized regime than indicated by the voltage clamp derived  
245 data (and, given the continuity of the modeled  $\tau$  function, why this influence expands into the  
246 more hyperpolarized values of even our "best constrained" voltage range). An approximate range  
247 of voltages for which the human h-current model is best constrained, and thus most reasonably  
248 expected to be validated by this secondary experimental data, is highlighted in Figure 6 and "zoomed  
249 in" on in the second and fourth rows.

250 There are clear correspondences between the human h-current model's kinetics and those  
251 derived from voltage clamp protocols that highlight differences between the human and rodent  
252 kinetics, especially when the model presented here is compared to the rodent model of *Kole et al.*



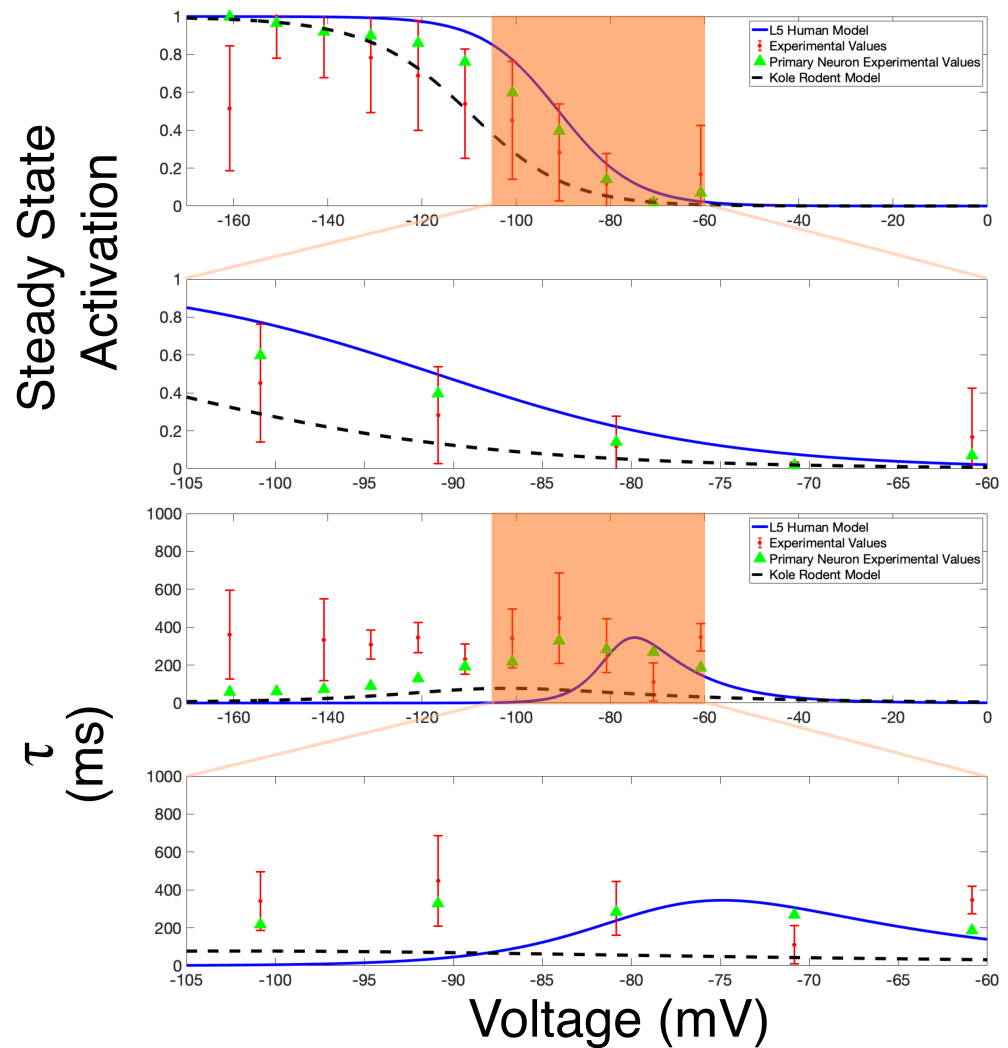

**Figure 6. The human h-current model presented in this work is validated by comparison to experimental voltage clamp data.** Plots of steady-state activation (top two rows) and  $\tau$  (bottom two rows) curves, where the entire voltage range is shown on top, with the voltage range where the model is primarily constrained highlighted in orange and then displayed “zoomed in” below. The values for our L5 human h-current model are shown in blue, with these values juxtaposed with those extracted from voltage clamp experiments: data from the primary cell are shown via green triangles, and data averaged over a number of L5 cortical pyramidal cells (with the standard deviation shown via error bars) are shown in red. For comparison, analogous curves from the *Kole et al. (2006)* rodent h-current model are shown via a dotted black line.

253 (2006). We note that these differences are also apparent in the experimental data alone, but we  
 254 focus on the differences in the models given the aims of this study. Most importantly, the human  
 255 experimental data shows maximum  $\tau$  values around 400-500 ms. The maximum  $\tau$  value in the  
 256 human h-current model is similar, at approximately 350 ms. However, the *Kole et al. (2006)* model  
 257 is different by an order of magnitude, never exceeding 80 ms. The experimental data shows that  
 258 the  $\tau$  value of the human h-current should be significantly higher than that typically seen in rodents,  
 259 a feature replicated by our model.

260 Our human h-current model matches the kinetics predicted by the voltage clamp experiments,  
 261 particularly those from the same cell, very well within the voltage range at which the data was most  
 262 constrained. The  $\tau$  values between -80 to -60 mV are a close fit with the human h-current model,  
 263 whereas those of the *Kole et al. (2006)* model are off by approximately an order of magnitude.  
 264 Moreover, the steady state activation curve fits the experimentally observed values in the primary

265 neuron very well between -100 and -80 mV, and qualitatively better matches the “shape” of the  
266 primary neuron’s values than the *Kole et al. (2006)* model.

267 Taken together, these pieces of data validate that our human h-current model is biologically  
268 reasonable based on the available experimental results, particularly those from the primary neuron.  
269 Critically, the relative magnitude of the  $\tau$  values in our model and the *Kole et al. (2006)* model lend  
270 support to the viability of our model in human L5 neurons.

271 The accuracy of the h-current kinetics predicted by our model is pivotal, and justifies our model  
272 development approach generally. The fact that we can use mathematical modeling to accurately  
273 describe the unique characteristics of the h-current in this setting indicates that the cycling technique  
274 described here could be successfully applied to other modeling endeavors where experimental data  
275 from a single cell is similarly limited. In the specific context of this work, these different kinetics and  
276 their validation allow for a comparison between rodent and human h-current kinetics. Moreover,  
277 considering that the h-current is implicated throughout the literature in determining subthreshold  
278 resonance (*Kispersky et al., 2012; Zemankovics et al., 2010; Hu et al., 2002; Kalmbach et al., 2018*),  
279 this model now provides an opportunity to probe the relationship between this particular ionic  
280 current and this neural dynamic.

281 We first investigate the model’s capacity for subthreshold resonance by recording the voltage  
282 response to the application of a subthreshold ZAP current. We focus on this protocol because data  
283 describing the response of human L5 cortical pyramidal cells to this experimental paradigm *in vitro*  
284 are presented by *Chameh et al. (2019)* and so allow comparison. In particular, the human L5 cortical  
285 pyramidal cells studied in that work do not exhibit subthreshold resonance. When analogous *in*  
286 *silico* protocols to the experiments presented by *Chameh et al. (2019)* are performed (described in  
287 detail in the Materials and Methods section), our model does not exhibit subthreshold resonance,  
288 as shown in Figure 7A (in comparison to experimental results shown in Figure 7B). We note that we  
289 will compare these results to those from rodent-derived models in the following section.

290 This finding provides further validation for our model: despite subthreshold resonance dynamics  
291 not being used to directly constrain our model, our model replicates what is seen experimentally  
292 under this protocol. This validation extends generally to our modeling approach, as this finding  
293 implies that features that were actively “fit” in model generation, in particular the conductances  
294 and passive properties dictating the voltage response to hyperpolarizing current clamp traces, are  
295 essential in driving other, more complex neural dynamics.

296 Taken together, these validation studies indicate that this model provides a means by which  
297 one could explore human-specific dynamics in L5 cortical pyramidal cells. Specifically, an investi-  
298 gation into the relationship between the detailed biophysical model and its various ionic currents  
299 (particularly the h-current) and subthreshold behaviours is now well justified. Indeed, the lack of  
300 subthreshold resonance observed experimentally by *Chameh et al. (2019)* was somewhat surpris-  
301 ing, as subthreshold resonance (in the 3-5 Hz range) is observed in some superficial layer human  
302 pyramidal neurons (*Kalmbach et al., 2018*) and rodent L5 pyramidal neurons (*Silva et al., 1991;*  
303 *Ulrich, 2002; Dembrow et al., 2010; Schmidt et al., 2016*). These experimental results also showed  
304 that the “sag” voltage indicating the presence of h-channels is more pronounced in human L5 cells  
305 as opposed to deep layer L2/3 (*Kalmbach et al., 2018; Chameh et al., 2019*). Considering the con-  
306 sensus that the h-current play some role in driving subthreshold resonance (*Hu et al., 2002, 2009;*  
307 *Zemankovics et al., 2010; Kalmbach et al., 2018*), these findings might initially seem contradictory.  
308 Our model neuron is uniquely situated to probe this relationship in detail.

### 309 **Inter-species h-current kinetic differences influence dichotomous subthreshold** 310 **resonance characteristics in model neurons**

311 With the model validated, we now compare the behavior of our human L5 cortical pyramidal cell  
312 model to two other existing models. The first model is the rodent L5 cortical pyramidal model as  
313 developed by *Hay et al. (2011)*, which motivated the ion channel types implemented in the human  
314 model (see the Materials and Methods). The second model is the human deep L3 pyramidal cell

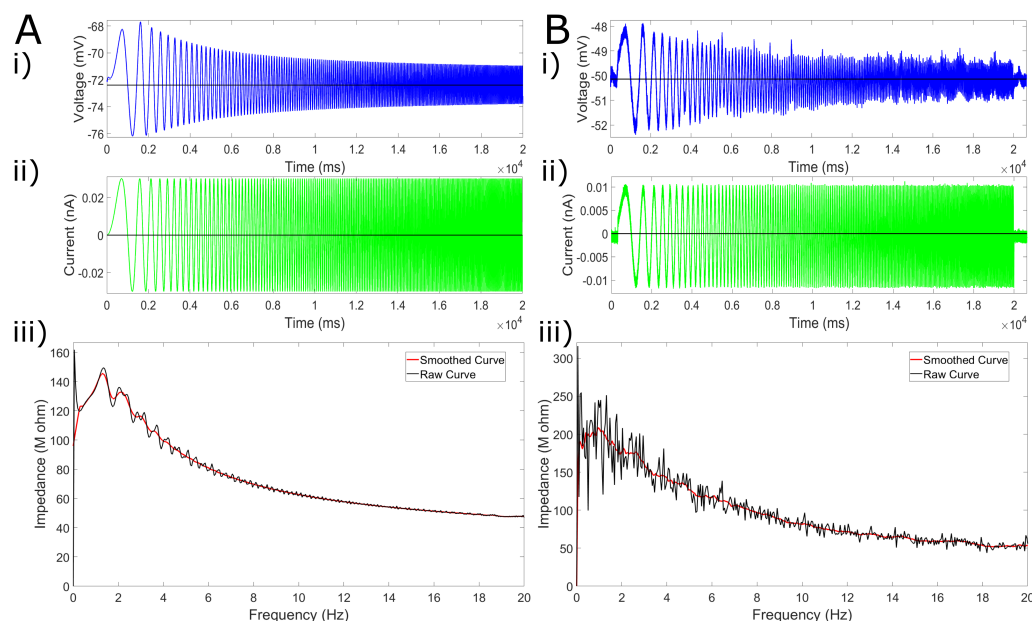

**Figure 7. Model matches experimental data from human L5 pyramidal neurons lacking subthreshold theta resonance in response to ZAP function input.** (A) *In silico* results from the model neuron to subthreshold current input from a ZAP function. The voltage response is shown in **i**), the input current in **ii**), and the calculated impedance in **iii**), illustrating the lack of a peak at theta frequency. (B) Example *in vitro* results of an analogous ZAP protocol (plots correspond with those in panel A) show the lack of subthreshold resonance experimentally.

315 model of *Kalmbach et al. (2018)*, which was built based on human deep L3 morphological and  
 316 electrophysiological data with the h-channel as the only voltage-gated ion channel type present in  
 317 the model (see the Materials and Methods for details).

318 The h-current models used in each of these three models are compared in Figure 8. Moving  
 319 forward, we will refer to the cell model presented in this paper as the “L5 Human” model to  
 320 differentiate it from the Hay and Kalmbach models. The dynamics of the h-current model in the L5  
 321 Human model is as shown previously in Figure 6 in comparison with experimental data. Figure 6  
 322 also included the rodent model of *Kole et al. (2006)* that is used by *Hay et al. (2011)*. The differences  
 323 between our human h-current model compared to the rodent Kole model are that the steady state  
 324 activation curve is shifted significantly towards more positive voltages, and the kinetics are much  
 325 slower (indicated by larger values of  $\tau$ ), between approximately -90 and -40 mV. In Figure 8, these  
 326 differences can be seen and compared to the h-current model that is used by *Kalmbach et al.*  
 327 *(2018)*, which is a slight adaptation of the model presented by *Kole et al. (2006)* (described in detail  
 328 in the Materials in Methods).

329 Given the impetus of this modeling endeavor, we compare the capacity for each of these three  
 330 models to exhibit subthreshold resonance. In applying an identical ZAP protocol as above for our  
 331 L5 Human model (see Figure 7), we find that both of these other models, unlike our L5 Human  
 332 model, exhibit subthreshold resonance at approximately 4.6 Hz as shown in Figure 9.

333 A quantification of these model comparisons is given in Table 2. Alongside results for the  
 334 baseline models (illustrated in Figure 9), we also include results for the L5 Human and Hay models  
 335 with all channels besides the h-channel blocked in order to facilitate a more direct comparison with  
 336 the Kalmbach model (which has no other active ion channels). This alteration results in a minor  
 337 change in the resting membrane potential (RMP) of the neuron, as would be expected, but no major  
 338 change in its resonance frequency.

339 The finding that the Hay model exhibits subthreshold resonance is as expected considering  
 340 that subthreshold resonance has been previously observed in rodent L5 cortical pyramidal cells

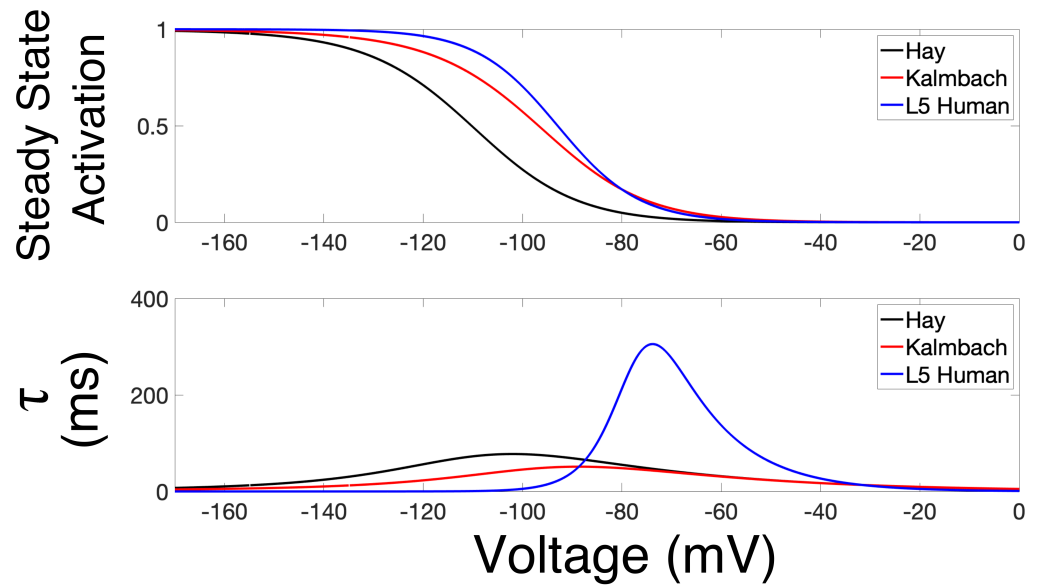

**Figure 8. Comparison of h-current models used in three cortical pyramidal neuron models.** Plot of steady-state activation curve (top) and  $\tau$  (bottom) of the h-current model used by *Hay et al. (2011)*, *Kalmbach et al. (2018)*, and in the model presented in this paper (referred to as “L5 Human”).

**Table 2.** Quantified results of the ZAP protocol applied to the three pyramidal cell models of interest highlight different propensities for subthreshold resonance.

| Model    | Conditions                                                 | RMP       | Frequency of Peak Impedance (>1 Hz) |
|----------|------------------------------------------------------------|-----------|-------------------------------------|
| L5 Human | Default                                                    | -72.40 mV | 1.35 Hz                             |
| L5 Human | Block all channels besides h-channel                       | -72.00 mV | 1.37 Hz                             |
| Hay      | Default                                                    | -77.25 mV | 4.65 Hz                             |
| Hay      | Block all channels besides h-channel                       | -76.87 mV | 4.65 Hz                             |
| Kalmbach | Default (model’s only active ion channel is the h-channel) | -78.41 mV | 4.65 Hz                             |

341 (*Silva et al., 1991; Ulrich, 2002; Dembrow et al., 2010; Schmidt et al., 2016*). This behavior is also  
 342 displayed by some of the neurons making up the population studied by *Kalmbach et al. (2018)*,  
 343 including the neuron motivating their *in silico* model, in which the implemented h-current model was  
 344 similar to the rodent h-current model presented by *Kole et al. (2006)* and used by *Hay et al. (2011)*.  
 345 The lack of resonance of our L5 Human model, when contrasted to the subthreshold resonance  
 346 exhibited by the Hay and Kalmbach models, begs the question of what role the differences in  
 347 h-current kinetics in models might play in dictating this dynamic.

348 To examine this possibility, we first note that the kinetics of the human h-current model be-  
 349 come faster, and in turn closer to what is seen in the rodent model of *Kole et al. (2006)* (utilized  
 350 unaltered by *Hay et al. (2011)*), at more hyperpolarized voltages (see Figure 8). Thus, if we add a  
 351 hyperpolarizing DC current to the injected ZAP current to lower the value around which the voltage  
 352 oscillates, different kinetics for the h-current would also be invoked. Figure 10 shows the results of  
 353 such *in silico* experiments for four different values of this hyperpolarizing DC shift. The impedance  
 354 plots (the bottom figure in each panel) clearly show that, as the mean voltage becomes more  
 355 hyperpolarized (as can be seen in the top voltage trace plot by a horizontal black line), the curve

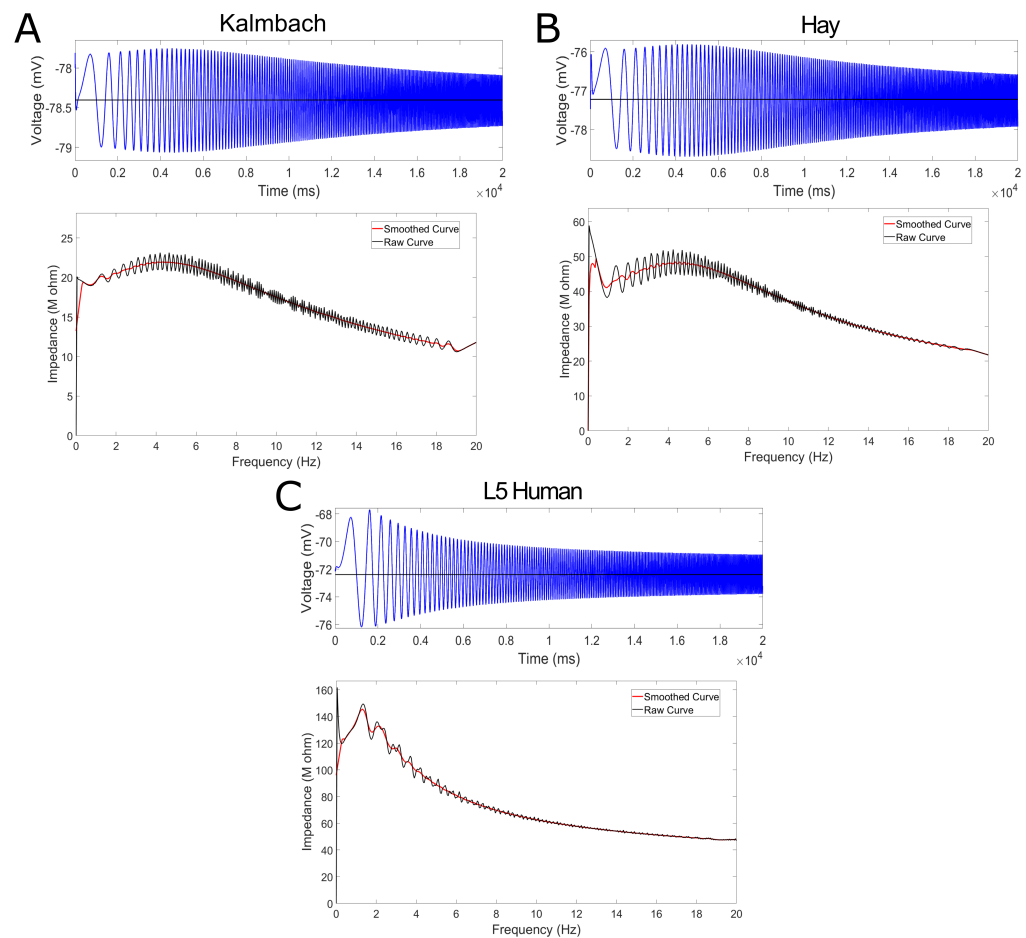

**Figure 9. Two pyramidal cell models utilizing h-current kinetics motivated by rodent data each exhibit subthreshold resonance. (A-C)** Voltage trace (top) and impedance profile (bottom) for the three model pyramidal cells of interest in this study. Previous models from *Kalmbach et al. (2018)* (A) and *Hay et al. (2011)* (B) both exhibit subthreshold resonance, illustrated by a peak in their impedance profiles between 4 and 6 Hz. In comparison, the L5 Human model ((C), replicated from previous Figure 7) does not show this peak.

356 and the corresponding peak begin shifting rightwards, with an obvious peak appearing in panels C  
 357 and D. This resonance is also clearly shown in the corresponding voltage traces.

358 By comparing the different resting voltages in the protocols presented in Figure 10 (and summa-  
 359 rized in Table 3) with the voltage-dependent  $\tau$  values in the human h-current model (shown in Figure  
 360 8), a correlation is apparent between the tendency to exhibit subthreshold resonance and faster  
 361 h-current kinetics. Indeed, the resonance is most apparent when the L5 Human model oscillates  
 362 about voltages where the h-current kinetics are as fast, if not faster, than their rodent counterparts  
 363 (Figure 10C-D). While the hyperpolarizing DC shift also elicits higher steady state activation values,  
 364 our comparisons in this section indicate that subthreshold resonance can arise when the steady  
 365 state activation value is very low: indeed, the Hay model exhibits subthreshold resonance around  
 366 a resting membrane potential of approximately -77 mV, where the model has the lowest steady  
 367 state activation value observed in any of the experiments performed in this exploration (see Figure  
 368 8). This subtle but critically important result illustrates that there is a negligible possibility that  
 369 changes in the steady state activation value might confound the influence of the  $\tau$  value in dictating  
 370 subthreshold theta resonance in these experiments.

371 For comparison purposes, we also perform analogous *in silico* experiments on the Hay and  
 372 Kalmbach models, with the results summarized in Table 3. In each of these hyperpolarized settings  
 373 both the Hay and Kalmbach models continue to exhibit subthreshold resonance, as would be

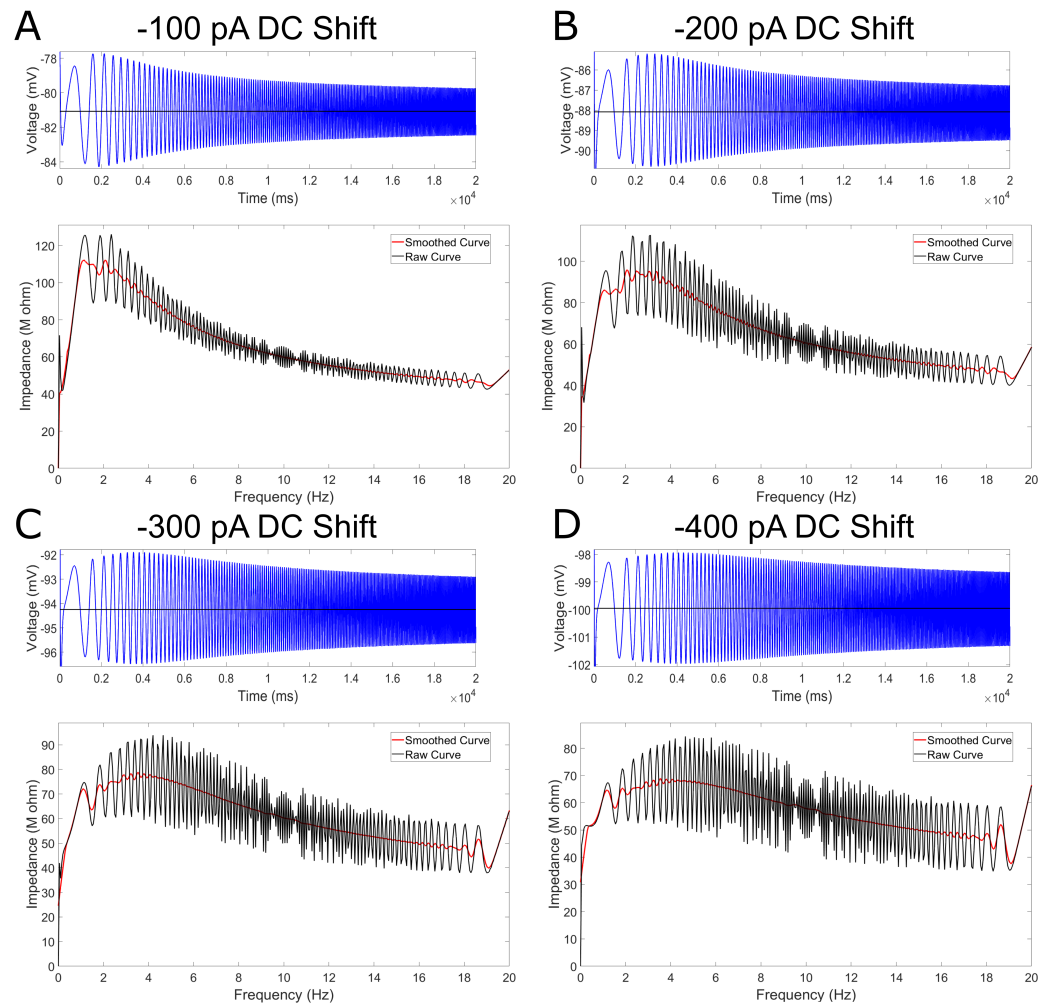

**Figure 10. L5 Human model can exhibit subthreshold resonance if held at lower voltages at which the h-current kinetics are faster, implicating these kinetics as playing a crucial role in this dynamic. (A-D)** Voltage traces (top) and impedance plots (bottom) for ZAP function protocol identical to that shown in Figure 7 **A-B** with the exception of the addition of DC current to hyperpolarize the cell. DC current is -100 pA in panel **(A)**, -200 pA in panel **(B)**, -300 pA in panel **(C)**, and -400 pA in panel **(D)**. Subthreshold resonance reappears clearly as the membrane potential becomes less than -90 mV, where the kinetics of the h-current are as fast or faster than in the *Kole et al. (2006)* model (see Figure 6).

374 expected considering such changes do not affect the kinetics of the h-current in these models as  
 375 significantly as in the L5 Human model.

376 We emphasize that there are multiple factors at play in determining whether a neuron exhibits  
 377 subthreshold resonance, not just the activity of the h-current: indeed, the neuron's morphology,  
 378 passive properties and other active currents all may play a role (*Hu et al., 2002; Kispersky et al.,*  
 379 **2012**). However, we note that using our *in silico* model we are able to more directly address the  
 380 contribution of the h-current in the neurons' responses to these protocols. In particular, when  
 381 comparing the L5 Human and Hay models (given that the Kalmbach model only contains the  
 382 h-current), we find that the h-current is the dominant inward ionic current when the ZAP current is  
 383 delivered alongside a hyperpolarizing DC current, which is not surprising given the known voltage  
 384 dependence of the various ionic currents modeled here (see the full equations dictating the various  
 385 ionic currents' voltage dependencies in *Hay et al. (2011)*). In fact, the only scenario in which another  
 386 inward current contributes non-trivially in these *in silico* experiments is when the default L5 Human  
 387 model is subjected to the ZAP current with no DC current: this is the only case in which the resting

**Table 3.** Quantified results of the ZAP protocol applied with DC shifts to the three pyramidal cell models of interest (with all included ionic currents active)

| Model    | DC shift | RMP       | Frequency of Peak Impedance (>1 Hz) |
|----------|----------|-----------|-------------------------------------|
| L5 Human | -100 pA  | -80.96 mV | 2.35 Hz                             |
| L5 Human | -200 pA  | -87.86 mV | 3.10 Hz                             |
| L5 Human | -300 pA  | -93.94 mV | 4.65 Hz                             |
| L5 Human | -400 pA  | -99.52 mV | 4.65 Hz                             |
| Hay      | -100 pA  | -81.04 mV | 5.45 Hz                             |
| Hay      | -200 pA  | -84.47 mV | 5.80 Hz                             |
| Hay      | -300 pA  | -87.55 mV | 6.45 Hz                             |
| Hay      | -400 pA  | -90.28 mV | 6.75 Hz                             |
| Kalmbach | -100pA   | -80.28 mV | 5.45 Hz                             |
| Kalmbach | -200pA   | -82.05 mV | 5.80 Hz                             |
| Kalmbach | -300pA   | -83.73 mV | 5.80 Hz                             |
| Kalmbach | -400pA   | -85.34 mV | 5.80 Hz                             |

388 membrane potential of the neuron is high enough to activate another inward current, in this case  
 389 through the Na<sub>Ta</sub> sodium channel. However, considering that, as shown in Table 2, blocking this  
 390 current does not affect the L5 Human neuron's capacity for resonance, we can reasonably assume  
 391 that this activity is not playing a major role in dictating this neuron's lack of subthreshold resonance.

392 In our endeavor to support the hypothesis that a relationship exists between the kinetics of the  
 393 h-current and a neuron's capacity for subthreshold resonance, the above analysis provides support  
 394 in one logical "direction": by "speeding up" the kinetics of the h-current in the setting of our L5  
 395 Human model, resonance is observed where it previously was not. If we can provide support in the  
 396 other "direction", namely by showing that "slowing down" the kinetics of the h-current can eliminate  
 397 resonance where it once was present (i.e. the Hay or Kalmbach models), we will have more complete  
 398 logical support of our hypothesis. We perform such an investigation via an examination of "hybrid"  
 399 neural models in which rodent h-current models (that of Hay and Kalmbach) are replaced with the  
 400 human h-current model; in doing so, the *only* change in a "hybrid" model from its original state is in  
 401 the kinetics of the h-current. This choice not only achieves the desired logical goal, but also allows  
 402 for potentially broader conclusions to be drawn regarding human and rodent differences.

403 Before beginning this investigation, it is important to note that such a switch between human  
 404 and rodent h-current models would affect other aspects of the cellular model (including, for  
 405 example, the resting membrane potential, as well as the potential activity of other ion channels)  
 406 that might affect its behavior. Moreover, the differing morphology and passive properties that  
 407 make up the "backbones" of these models also differ significantly, and these properties also play a  
 408 role in dictating a neuron's frequency preference (*Hutcheon and Yarom, 2000; Rotstein and Nadim,*  
 409 *2014*). It is for these reasons that we emphasize that, in performing such a "switch", we create  
 410 new "hybrid" models that must be approached cautiously. However, a very specific focus on the  
 411 subthreshold dynamics of these "hybrids" makes their use as presented here reasonable. There  
 412 are two primary rationales for this assertion: first, a focus on subthreshold dynamics significantly  
 413 minimizes the role that other ionic currents (whose features vary between "model backbones") will  
 414 play in the dynamics; and second, by only switching the h-current models (i.e. the kinetics of the  
 415 h-current), and not the distribution nor conductance of the h-channel, the focus can be mainly on  
 416 how the different kinetics might play a role (i.e., differences shown in Figure 8).

417 The results obtained are summarized in Table 4. Most critically we observe that, when the Hay  
 418 and Kalmbach models have their respective h-current models replaced with the human h-current  
 419 model, these "hybrids" no longer exhibit subthreshold resonance in response to a default ZAP

420 protocol (i.e. no DC shift). As the RMPs of these “hybrids” are within the range of voltages for which  
 421 the human h-current displays significantly slower kinetics than the rodent models, these results are  
 422 support for the second “direction” in our argument: namely, by “slowing down” the h-current kinetics  
 423 in the hybrid model as compared to the baseline model, we eliminate the previously observed  
 424 subthreshold resonance. Doing so in this fashion also further emphasizes the importance of the  
 425 differences in the human and rodent h-current models in dictating neural dynamics.

**Table 4.** Quantified results of the ZAP protocol applied to “hybrid” models with and without DC shifts

| Model “backbone”<br>from: | H-current<br>model from: | Name of “hybrid” model   | DC shift | RMP       | Frequency of Peak<br>Impedance (>1 Hz) |
|---------------------------|--------------------------|--------------------------|----------|-----------|----------------------------------------|
| Hay                       | L5 Human                 | Hay-L5 Human hybrid      | 0 pA     | -72.42 mV | 1.45 Hz                                |
| Hay                       | L5 Human                 | Hay-L5 Human hybrid      | -200 pA  | -77.94 mV | 1.15 Hz                                |
| Hay                       | L5 Human                 | Hay-L5 Human hybrid      | -400 pA  | -82.40 mV | 3.05 Hz                                |
| Kalmbach                  | L5 Human                 | Kalmbach-L5 Human hybrid | 0 pA     | -78.38 mV | 1.10 Hz                                |
| Kalmbach                  | L5 Human                 | Kalmbach-L5 Human hybrid | -200 pA  | -81.73 mV | 2.30 Hz                                |
| Kalmbach                  | L5 Human                 | Kalmbach-L5 Human hybrid | -400 pA  | -84.70 mV | 5.05 Hz                                |

426 For completeness, we perform analogous experiments with a DC shift on these hybrids as was  
 427 done on the L5 Human model. As expected, in the “hybrids” in which a rodent h-current model  
 428 is replaced by the L5 Human h-current model, a hyperpolarizing DC shift can serve to reestablish  
 429 subthreshold theta resonance, just as in the baseline L5 Human pyramidal cell model. Indeed,  
 430 with -400 pA DC shifts, both the “Hay-L5 Human” and the “Kalmbach-L5 Human” models show  
 431 a preferred frequency greater than 3 Hz, and the hyperpolarized resting voltages under these  
 432 protocols are in a range at which the kinetics of the human h-current approach the kinetics of the  
 433 rodent h-current models.

434 Taken together, these results provide crucial support for the argument that the differing h-  
 435 current kinetics in L5 between humans and rodents play a role in dictating the neural dynamic of  
 436 subthreshold resonance. This support is bolstered by the dual directions of our causal argument:  
 437 we can “rescue” resonance by “speeding up” the kinetics of the h-current, and we can “eliminate”  
 438 resonance by “slowing down” the kinetics of the h-current. The additional fact that eliminating  
 439 resonance can be achieved by “slowing down” the h-current by imposing human h-current kinetics  
 440 on a rodent model, thus creating a “hybrid” model, further emphasizes the functional importance  
 441 of the inter-species differences identified both experimentally and computationally.

## 442 Discussion

443 In this work, we present a biophysically detailed, multi-compartment, full spiking model of a human  
 444 L5 cortical pyramidal cell that is constrained primarily from morphological and electrophysiological  
 445 data from the same cell. The model leads to a mathematical characterization of the h-current  
 446 that is specific to human cortical cells and is validated against experimental data from the primary  
 447 cell that was not used in model development. Our model additionally mimics subthreshold (a  
 448 lack of resonance) and general spiking (repetitive spiking frequencies and capacity for PIR spiking)  
 449 characteristics observed experimentally in a separate population of human L5 cortical pyramidal  
 450 cells. The fact that the lack of subthreshold resonance was not directly involved in constraining our  
 451 model indicates that our fitting procedure was able to capture a crucial “essence” of these cells’  
 452 more complex dynamics, even given the limitations imposed on the modeling process by the data  
 453 obtained from the primary cell.

454 This unique computational model allowed us to perform a detailed *in silico* investigation into  
 455 the relationship between subthreshold resonance and the h-current. This exploration provided  
 456 convincing support of a strong relationship between the time constant of the h-current’s activity  
 457 and the capacity for subthreshold resonance: such resonance can be “rescued” in cells in which it is



absent by “speeding up” the h-current’s kinetics, and “eliminated” in cells in which it is present by “slowing down” the h-current’s kinetics. This relationship, combined with the major differences in the speed of the h-current in the human and rodent settings, indicates that there are key functional consequences to the inter-species cellular differences identified in this research.

### Multi-compartment human cell model development using a unique data set

All computational models are, in some form, an idealization and abstraction of the physical entity of interest. Given the inherent limitations on such modeling endeavors, the choices of where the necessary approximations are implemented must be made with an overall research question in mind. Such choices should ensure that it is reasonable to use the model to make inquiries into the particular question of interest, which may come at the cost of the model’s accuracy or validity in other contexts. Indeed, it is highly unlikely given contemporary tools that an entirely “realistic” neuron model, encapsulating all known properties and dynamics of a biological cell, can ever be obtained; instead, computational neuroscientists must limit the scope of their inquiries and conclusions to the context in which the model was constrained, and is thus the most “realistic” (Almog and Korngreen, 2016).

Here, we aimed to make best use of the unique data set motivating this model, namely morphology and a suite of current clamp recordings (in the presence of a voltage-gated sodium channel blocker) obtained from the same human cell. By primarily constraining our model with these data, we minimized the likelihood that cell-to-cell variability could compromise the validity of the model (Marder and Goaillard, 2006; Golowasch et al., 2002), especially considering the primary parameters that were optimized were channel conductances (Goaillard et al., 2009; Ransdell et al., 2013).

However, naively “fitting” our model to just these current clamp recordings omitted a crucial component of the neuron’s function: its spiking characteristics. Given that all recordings from our primary neuron were obtained in the presence of TTX, we could not infer any such characteristics from this primary neuron. This led to the implementation of the informed “cycling” fitting technique schematized in Figure 2. In this fashion, we maintained the benefits of the primary constraining data coming from a single neuron, while also ensuring the neuron retained key spiking characteristics of similarly classified neurons. While this decision brought with it a trade-off in the form of a less accurate fit of the depolarizing current clamp step, retaining these spiking characteristics greatly expanded the realm in which it is “appropriate” to use this model (an example of which can be found in the discussion of frequency-dependent gain below). By well rationalizing each step in the modeling process (see details in the Materials and Methods), we ensured it is appropriate to use our model both in the specific context of analyzing the role of the h-current in subthreshold behaviors, but also in an analysis of how this and other ion channel types might influence general spiking characteristics of human L5 cortical pyramidal cells.

We emphasize that this technique minimizes the potential confounding impact that averaging values, such as passive properties, over multiple cells might have. Indeed, it is well established that the morphology of the neuron plays an important role in dictating its passive properties (Mohan et al., 2015; Eyal et al., 2016; Beaulieu-Laroche et al., 2018; Gouwens et al., 2018); as such, imposing passive properties obtained from multiple neurons onto a single morphology in our model is fraught with the potential for error. This is also critical for the h-current, as there is ample evidence in rodents that the h-channel is not distributed uniformly across the dendrites, but rather its density increases exponentially away from the soma (Ramawamy and Markram, 2015; Kole et al., 2006; Harnett et al., 2015); once again, were we to use averages to fit our h-current conductance and kinetics, rather than data from a single cell, the role of the different morphology of each individual cell might impact the “realism” of our final model and its single morphology.

However, as with any modeling endeavor, our cycling technique imposes limitations on the contexts in which the model can be appropriately used. The spiking characteristics constraining model development were limited to repetitive spiking frequencies and the capacity for PIR spiking

508 observed in a secondary population of L5 pyramidal cells. Thus, any investigation of suprathreshold  
509 characteristics of this model must be done with the important caveat that such constraining data  
510 did not come from the primary neuron used in model creation. Furthermore, other features of  
511 cortical pyramidal cells that might influence the dynamics of human L5 pyramidal neurons, such  
512 as the spike shape (Molnár et al., 2008), calcium spiking (Hay et al., 2011), backpropagating action  
513 potentials (Hay et al., 2011; Larkum et al., 1999) and synaptic responses (Molnár et al., 2008; Eyal  
514 et al., 2018) were not used in model creation given the focus on h-current driven dynamics in this  
515 study.

516 In this vein, it is worth emphasizing that the varying density of the h-channel implemented in our  
517 model is driven from rodent findings following motivation from the model of Hay et al. (2011) (see  
518 details in the Materials and Methods). While there is some experimental evidence that h-channels  
519 are similarly distributed in human neurons (Beaulieu-Laroche et al., 2018), it is likely that there are  
520 some differences in these distributions given the distinct morphologies of similarly classified rodent  
521 and human pyramidal neurons. Thus, while we follow the distribution of the rodent h-channel in  
522 this model as a necessary strategy given the absence of similarly detailed human data, this is an  
523 aspect of the model that may be improved upon as such data becomes available.

524 Before using the model presented here to probe any of these, or other, features of a human  
525 L5 cortical pyramidal cell, some additional “confirmation” must be performed to gauge whether  
526 such properties are realistically constrained by the data used in model creation. However, in  
527 contexts where the model presented here is not immediately appropriate, “adjustments” based on  
528 other experimental data can be made to answer different research questions, just as was done  
529 by Shai et al. (2015) in their adjustments to the Hay et al. (2011) model. Indeed, such research is  
530 a fertile ground for future work utilizing this model: one potential avenue is better encapsulating  
531 the medium afterhyperpolarization (mAHP) implicated in determining a neuron’s suprathreshold  
532 frequency preference (Higgs and Spain, 2009) in order to make the model appropriate for an *in*  
533 *silico* investigation into the different influences the h-current and the mAHP play on these spiking  
534 features.

### 535 **Model comparisons**

536 In this manuscript we compare our human L5 cortical pyramidal cell model with two existing  
537 models: the detailed, multi-compartment, rodent L5 cortical pyramidal cell of Hay et al. (2011), and  
538 a multi-compartment model of a human cortical deep L3 pyramidal cell with only passive properties  
539 and the h-current presented by Kalmbach et al. (2018). Each of these models provides a useful  
540 point of comparison, the Hay et al. (2011) model because it is of an analogous rodent neuron with  
541 similar computational detail, and the Kalmbach et al. (2018) model because it is constrained by  
542 human data.

543 The Hay et al. (2011) model informed the choice of ion channels implemented in our model (see  
544 Materials and Methods) given that it was also of a L5 pyramidal cell, and the optimization of ionic  
545 conductances performed by Hay et al. (2011) was similar to our initial optimization method. During  
546 model generation we found that a best “fit” to our human experimental data led to significant  
547 changes in a variety of conductances (see Table 5) as well as the kinetics of the h-current. Although  
548 our model was not constrained by spiking properties such as backpropagating action potentials or  
549 calcium spikes like the Hay et al. (2011) model, this choice was motivated by the overall focus in  
550 this study on h-current driven dynamics. Considering this emphasis uncovered key inter-species  
551 differences, we feel that the model presented here is more suitable for an investigation of distinctly  
552 human cortical neuron dynamics.

553 We note that there exist a variety of other L5 rodent cortical pyramidal cell models (Keren et al.,  
554 2009; Almog and Korngreen, 2014; Farinella et al., 2014; Larkum et al., 2009) that are focused on  
555 features, often concerning spiking behavior, observed in rodent neurons. Thus, while these models  
556 may be better suited for *in silico* investigations of these neural dynamics generally speaking, our  
557 developed model presented would be much more appropriate to use for an investigation of human

558 cortical behaviors for the reasons outlined above.

559 The comparison between our model and other human neuron models is less clear than the  
560 conspicuous rodent versus human difference, although the number of these models is severely  
561 limited by access to human tissue. *Beaulieu-Laroche et al. (2018)* present a human L5 cortical  
562 pyramidal cell model, but unlike our current work, its morphology was not directly based on a  
563 human pyramidal cell. Rather, a modified rat pyramidal neuron morphology was “stretched” to  
564 allow comparison to the rodent model of *Hay et al. (2011)*. This model is therefore significantly  
565 less detailed morphologically than the one presented here, making direct comparison unjustified.  
566 Furthermore, while the Allen Institute is one of few laboratories currently using human data to  
567 generate computational neuron models with the level of morphological detail presented here, the  
568 human models that are a part of the Allen Brain Atlas (*Dong, 2008; Jones et al., 2009; Sunkin et al.,*  
569 *2012*) at present have their voltage-gated ion channels present only in the somatic regions. The  
570 recent model presented by *Kalmbach et al. (2018)* moves toward the expression of ion channels in  
571 dendritic regions, as h-channels are included throughout the dendrites. However, as this is the only  
572 voltage-gated ion channel included in the model, it lacks the detail of the model presented here.

### 573 **The h-current and resonance**

574 H-channels have been a focus of study for many reasons that include their pacemaking and  
575 resonant contributions (*Biel et al., 2009*). In particular, the role played by h-currents in dictating  
576 subthreshold resonance properties has been examined in excitatory cells (*Hu et al., 2002, 2009;*  
577 *Kalmbach et al., 2018; Zemankovics et al., 2010; Silva et al., 1991; Ulrich, 2002; Dembrow et al.,*  
578 *2010; Schmidt et al., 2016*), as well as inhibitory cells (*Kispersky et al., 2012; Zemankovics et al.,*  
579 *2010; Sun et al., 2014; Stark et al., 2013*) both in hippocampus and cortex, and the frequency of this  
580 subthreshold resonance has been found to be in the theta frequency range (3-12 Hz). This had led  
581 to suggestions of the importance of this feature in theta oscillations in general (e.g., see *Kispersky*  
582 *et al. (2012)*). However, the relationship between subthreshold and suprathreshold resonant and  
583 oscillatory dynamics has yet to be fully articulated: for example, a given subthreshold resonant  
584 frequency does not necessarily lead to a similar spiking resonant frequency (*Rotstein and Nadim,*  
585 *2014; Rotstein, 2017*). The dendritic filtering capacities of neurons (e.g., see *Vaidya and Johnston*  
586 *(2013)*) further complicates this relationship.

587 Theoretical and computational studies bring forth the importance of understanding the com-  
588 plexity of the interacting dynamics from different ion channel types and the passive properties in  
589 pursuit of better understanding this relationship (*Hutcheon and Yarom, 2000; Rotstein and Nadim,*  
590 *2014; Rotstein, 2017*). Moreover, the context of the behaving animal (*in vivo*-like) could also affect  
591 resonant effects as computationally explored in hippocampal interneurons (*Kispersky et al., 2012;*  
592 *Sekulić and Skinner, 2017*). Thus, whether the h-current is important for the existence of subthresh-  
593 old resonance should not be considered in a “vacuum”, but rather in the context of the multitude of  
594 potential insights this dynamic might yield into other functional characteristics both at the single  
595 neuron and network levels.

### 596 **Ongoing and future work**

#### 597 Biophysical predictions of differences in h-current kinetics

598 H-channels are tetramers that can be either homomeric (consisting entirely of the same subunit  
599 type) or heteromeric (consisting of different subunit types) (*Biel et al., 2009; Shah, 2018*). Interest-  
600 ingly, one of the primary differentiating factors between the four subunits are their time constants  
601 of activation, with HCN1 subunits being the fastest, HCN4 being the slowest, and HCN2-3 lying in  
602 between (*Shah, 2018*).

603 Viewed in the context of our study, the slower kinetics of the h-current that we observe both  
604 computationally and experimentally in human L5 pyramidal neurons (in comparison to their rodent  
605 counterparts) suggests that human L5 pyramidal cells might have an increased amount of non-  
606 HCN1 subunits amongst their h-channels. Indeed, human neurons in general, and L5 pyramidal

607 cells specifically, have an enrichment of HCN2 channels as revealed via mRNA expression (*Kalmbach*  
608 *et al., 2018*). HCN2 subunits have slower activation kinetics and a more negative half-activation  
609 voltage than HCN1 subunits (*Biel et al., 2009*), with research showing that heteromeric h-channels  
610 consisting of a mix of HCN1 and HCN2 subunits display slower kinetics than those seen in HCN1  
611 homomeric h-channels (*Chen et al., 2001*). Taken together, these results provide biophysical support  
612 for the hypothesis that the differences in the kinetics of the h-current revealed in this work may be  
613 driven by different HCN subunit expression between rodent and human L5 pyramidal neurons.

614 Indeed, in general resonance is a relatively uncommonly observed phenomenon in human  
615 neurons (*Kalmbach et al., 2018; Chameh et al., 2019*), which may be due to the greater expression  
616 of HCN2 channels in human neurons generally (*Kalmbach et al., 2018*). A detailed comparison  
617 between subunit expression in rodents and humans remains wanting given the clear predictions  
618 of this study. Additionally, since channel kinetics can be altered by post-translation modification,  
619 proteomics may be helpful in investigating post-translation modification of HCN subunits in human  
620 neurons.

621 Toward a better understanding of frequency-dependent gain in human L5 cortical pyrami-  
622 dal neurons

623 In characterizing a large population of human L5 cortical pyramidal neurons, *Chameh et al. (2019)*  
624 investigated both subthreshold and suprathreshold dynamics. The frequency-dependent gain  
625 (described in detail in the Materials and Methods) measure developed by *Higgs and Spain (2009)*  
626 encapsulates a cell's phase preference for spiking in response to an oscillatory input as a function  
627 of frequency. While such suprathreshold behaviors were not a focus of this modeling endeavor,  
628 given the availability of this experimental data for comparison purposes we applied an analogous  
629 *in silico* protocol to our model neuron.

630 Interestingly, despite frequency-dependent gain not being used in our model development,  
631 our L5 Human model still captures some key features observed experimentally in the frequency-  
632 dependent gain. As shown in Figure 11, the general shape of the frequency-dependent gain curve  
633 is similar in the model (panel **A**) and experimental (panel **B**) settings, in particular matching the  
634 peak in the 3-4 Hz range and the valley in the 5-10 Hz range. This correspondence further expands  
635 the realm in which it might be appropriate to utilize this model in future work; for example, a  
636 computational exploration may be uniquely suited to isolate the contribution of the h-current to  
637 suprathreshold frequency preference.

## 638 **Methods and Materials**

### 639 **Experimental recordings of human L5 cortical pyramidal cells**

#### 640 Ethics statement

641 Surgical specimens were obtained from Toronto Western Hospital. Written informed consent was  
642 obtained from all study participants as stated in the research protocol. In accordance with the  
643 Declaration of Helsinki, approval for this study was received by the University Health Network  
644 Research Ethics board.

#### 645 Acute slice preparation from human cortex

646 Neocortical slices were obtained from the middle temporal gyrus in patients undergoing a standard  
647 anterior temporal lobectomy for medically-intractable epilepsy (*Mansouri et al., 2012*). Tissue  
648 obtained from surgery was distal to the epileptogenic zone tissue and was thus considered largely  
649 unaffected by the neuropathology. We note that this is the same area from which recent data  
650 characterizing human L3 cortex was obtained (*Kalmbach et al., 2018*).

651 Immediately following surgical resection, the cortical block was placed in an ice-cold (approx-  
652 imately 4°C) slicing solution containing (in mM): sucrose 248, KCl 2, MgSO<sub>4</sub>·7H<sub>2</sub>O 3, CaCl<sub>2</sub>·2H<sub>2</sub>O 1,  
653 NaHCO<sub>3</sub> 26, NaH<sub>2</sub>PO<sub>4</sub>·H<sub>2</sub>O 1.25, and D-glucose 10. The solution was continuously aerated with

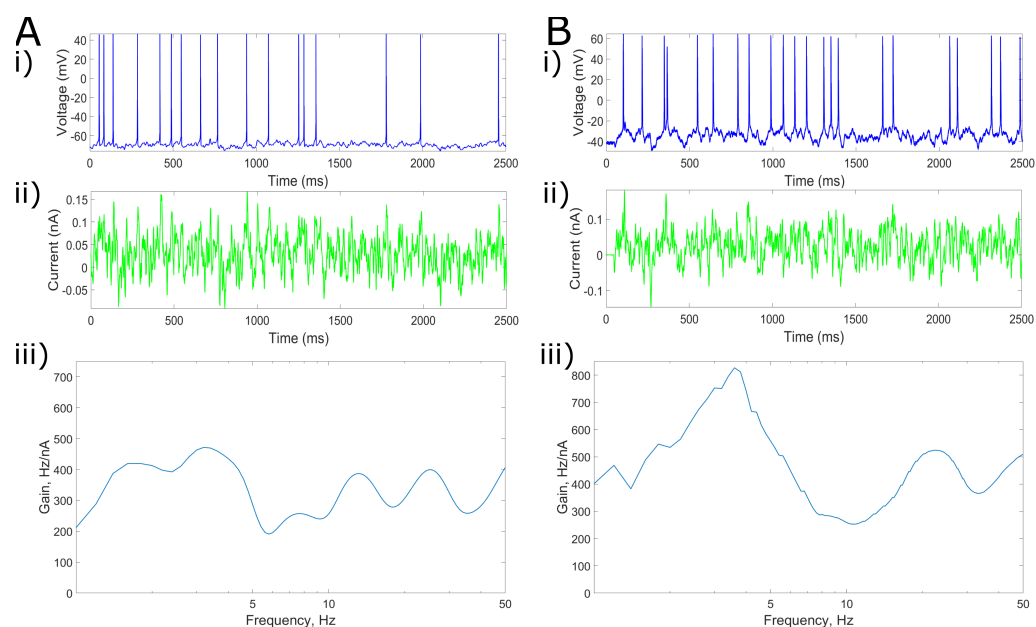

**Figure 11. Model mimics crucial frequency-dependent gain properties observed experimentally in human L5 pyramidal neurons.** (A) *In silico* results from the model neuron to the application of Gaussian-filtered white noise with a gain of 40 pA and a DC current chosen so that the neuron spikes at theta (4-10 Hz) frequency. An example voltage trace is shown in **i)**, the corresponding noisy input current in **ii)**, and the frequency-dependent gain (averaged over sixty different noisy inputs) in **iii)**. (B) Example *in vitro* results of an analogous frequency-dependent gain protocol (plots correspond with those in panel A). While the amplitude of the gain is higher in this plot (which can be explained by the firing being in the high theta, as opposed to low theta, range), the general shape of the frequency-dependent gain plot (namely the frequencies at which peaks and valleys occur) largely corresponds with the *in silico* results.

654 95% O<sub>2</sub>-5% CO<sub>2</sub> and its total osmolarity was 295-305 mOsm. Tissue blocks were transported to  
 655 the laboratory within 5 min. Transverse brain slices (400  $\mu$ m) were cut using a vibratome (Leica  
 656 1200 V) in slicing solution. Tissue slicing was performed perpendicular to the pial surface to ensure  
 657 that pyramidal cell dendrites were minimally truncated (Kostopoulos *et al.*, 1989; Kalmbach *et al.*,  
 658 2018). The slicing solution was the same as used for transport of tissue from the operation room  
 659 to the laboratory. The total duration of transportation and slicing was kept to a maximum of 20  
 660 minutes, as suggested by Köhling and Avoli (2006).

661 After sectioning, the slices were incubated for 30 min at 34°C in standard artificial cerebrospinal  
 662 fluid (aCSF). The aCSF contained (in mM): NaCl 123, KCl 4, CaCl<sub>2</sub>·2H<sub>2</sub>O 1, MgSO<sub>4</sub>·7H<sub>2</sub>O 1, NaHCO<sub>3</sub>  
 663 25, NaH<sub>2</sub>PO<sub>4</sub>·H<sub>2</sub>O 1.2, and D-glucose 10, pH 7.40. All aCSF and slicing solutions were continuously  
 664 bubbled with carbogen gas (95% O<sub>2</sub>-5% CO<sub>2</sub>) and had an osmolarity of 295-305 mOsm. Following  
 665 this incubation, the slices were kept in standard aCSF at 22–23°C for at least 1 h, until they were  
 666 individually transferred to a submerged recording chamber.

667 For the subset of experiments designed to assess frequency dependent gain, slices were  
 668 prepared using the NMDG protective recovery method (Ting *et al.*, 2014). The slicing and transport  
 669 solution was composed of (in mM): NMDG 92, KCl 2.5, NaH<sub>2</sub>PO<sub>4</sub> 1.2, NaH<sub>2</sub>PO<sub>4</sub>·H<sub>2</sub>O 30, HEPES  
 670 20, Glucose 25, Thiourea 2, Na L-ascorbate 5, Na-Pyruvate 3, CaCl<sub>2</sub>·2H<sub>2</sub>O 0.5, and MgSO<sub>4</sub>·7H<sub>2</sub>O  
 671 10. The pH of NMDG solution was adjusted to 7.3-7.4 using hydrochloric acid and the osmolarity  
 672 was 300-305 mOsm. Before transport and slicing, the NMDG solution was carbogenated for 15  
 673 min and chilled to 2-4 °C. After slices were cut (as described above), they were transferred to a  
 674 recovery chamber filled with 32-34 °C NMDG solution continuously bubbled with 95% O<sub>2</sub>-5% CO<sub>2</sub>.  
 675 After 12 minutes, the slices were transferred to an incubation solution containing (in mM): NaCl  
 676 92, KCl 2.5, NaH<sub>2</sub>PO<sub>4</sub>·H<sub>2</sub>O 1.2, NaHCO<sub>3</sub> 30, HEPES 20, Glucose 25, Thiourea 2, Na L-ascorbate 5,  
 677 Na-Pyruvate 3, CaCl<sub>2</sub>·2H<sub>2</sub>O 2, and MgSO<sub>4</sub>·7H<sub>2</sub>O 2. The solution was continuously bubbled with 95%

678 O<sub>2</sub> -5% CO<sub>2</sub>. After a 1-hour incubation at room temperature, slices were transferred to a recording  
679 chamber continuously perfused with aCSF containing (in mM): NaCl 126, KCl 2.5, NaH<sub>2</sub>PO<sub>4</sub>.H<sub>2</sub>O  
680 1.25, NaHCO<sub>3</sub> 26, Glucose 12.6, CaCl<sub>2</sub>.H<sub>2</sub>O 2, and MgSO<sub>4</sub>.7H<sub>2</sub>O 1.

### 681 Electrophysiological recordings

682 **Motivation for and limitations of the focus on recordings from a single neuron.** Access to  
683 human tissue provided no control over age, gender, or the particular aspect of the surgery involved,  
684 which only adds to the issue of experimental variability in recording between similarly classified cells.  
685 This, along with the issues presented by “cell-to-cell variability” discussed previously (*Golowasch*  
686 *et al., 2002*), motivated the choice to obtain as much electrophysiological data as possible from the  
687 same human L5 cortical pyramidal neuron.

688 While this choice is well-rationalized, there are limits to the amount of applicable data that  
689 can be obtained from a single cell. Indeed, in patch-clamp experiments (described below), key  
690 properties of the neuron (including, for example, the axial resistance) decay with time. We thus  
691 focused our modeling on a primary cell from which we obtained a good fill (for morphological  
692 reconstruction, described below) and a large and reliable set of recordings for model building and  
693 parameter fitting. This was a set of current clamp data obtained in the presence of TTX to block  
694 action potential firing (described in detail below) and voltage clamp data from this cell under the  
695 same setting.

696 It is worth emphasizing that, given limitations to our experimental protocol imposed by the use  
697 of human tissue, we were unable to perform voltage clamp experiments both with and without the  
698 h-channel blocker ZD in the same cell to truly “isolate” the h-current. This crucial factor helped to  
699 motivate the decision to use current clamp data to constrain our model; along with the issues of  
700 the space-clamp and maintaining self-consistency in the modeling process as described previously,  
701 without ZD recordings we can not assert with full certainty that the h-current features derived from  
702 voltage clamp data are not influenced by other channels. It is for this reason that this data was  
703 used for model validation, in which these “approximate” values of the h-current kinetics are more  
704 appropriate, rather than direct model constraint.

705 To supplement the data from the primary neuron, we made use of averaged experimental data  
706 from multiple secondary cells. This provided the data of Table 1, which are averaged data from 147  
707 cells, and the mean  $\pm$  standard deviation plots in Figure 6. For the data in Figure 6, we note that for  
708  $\tau$  values, the values between -70 and -110 mV are averaged over 14 neurons, while the remaining  
709 values are averaged over 5 neurons. For the steady state activation plot, values between -150 and  
710 -70 mV are averaged over 14 neurons, while the extreme values at -160 and -60 mV are averaged  
711 over 5 neurons. The details in how these values were derived from voltage clamp experiments are  
712 included in the following.

713 **Experimental setting.** *In vitro* whole-cell recordings were obtained from human neocortical L5  
714 neurons. For recording, slices were transferred to a recording chamber mounted on a fixed-stage  
715 upright microscope (Axioskop 2 FS MOT; Carl Zeiss, Germany), and were continually perfused at 8  
716 ml/min with standard aCSF at 32-34 oC. All experiments were performed with excitatory (APV 50  
717  $\mu$ M, Sigma; CNQX 25  $\mu$ M, Sigma) and inhibitory (Bicuculline 10  $\mu$ M, Sigma; CGP-35348 10  $\mu$ M, Sigma)  
718 synaptic activity blocked. Cortical neurons were visualized using an IR-CCD camera (IR-1000, MTI,  
719 USA) with a 40x water immersion objective lens.

720 Patch pipettes (3-6 M $\Omega$  resistance) were pulled from standard borosilicate glass pipettes (thin-  
721 wall borosilicate tubes with filaments, World Precision Instruments, Sarasota, FL, USA) using a  
722 vertical puller (PC-10, Narishige). Pipettes were filled with intracellular solution containing (in mM):  
723 K-gluconate 135, NaCl 10, HEPES 10, MgCl<sub>2</sub> 1, Na<sub>2</sub>ATP 2, GTP 0.3, and biocytin (3-5mg/mL). The  
724 solution's pH was adjusted with KOH to 7.4 and its osmolarity was 290-300 mOsm. Whole-cell  
725 patch-clamp recordings were obtained with an Multiclamp 700A amplifier and pClamp 9.2 data  
726 acquisition software (Axon Instruments, Molecular Devices, USA). Subsequently, electrical signals  
727 were digitized at 20 kHz using a 1320X digitizer. The access resistance was monitored throughout

728 the recording (typically between 8-25 M $\Omega$ ), and cells were discarded if access resistance was > 25  
729 M $\Omega$ . The liquid junction potential was calculated to be 10.8 mV which is corrected for whenever the  
730 experimental data is used for modeling or in direct comparison to model values (i.e. Figure 6), but  
731 not when the experimental data is presented on its own (i.e. Figure 7B and D).

732 **Current clamp data directly constraining computational modeling** Current clamp data used  
733 as the primary constraint for the computational model presented here was obtained from the  
734 primary cell in the following fashion. Hyperpolarizing current pulses (1000 ms duration, -50-400 pA,  
735 step size: 50 pA) and depolarizing current pulses (1000 ms duration, 50-400 pA/ step size: 50 pA)  
736 were injected to measure passive and active membrane properties in presence of voltage gated  
737 sodium channels blocker (TTX 1  $\mu$ M; Alomone Labs). This data is highlighted in Figure 1.

738 **Characterization of h-current kinetics using voltage clamp data.** To characterize the h-current  
739 kinetics, 1000 ms-long voltage clamp steps were used in -10 mV increments, down to -140 mV  
740 from a holding potential of -60 mV. The tail current was quantified as the difference between peak  
741 amplitude of residual current at the end of each holding potential and the steady state current from  
742 holding potentials of -140 to -60 mV. This value was used to calculate the steady-state activation  
743 curve as presented in Figure 6 by normalizing these values between 0 and 1. To calculate the time  
744 constant of the h-current, a single or double-exponential model was fitted to the initial response of  
745 the neuron to the voltage clamp using Clampfit 10.7 (Molecular devices). In experiments quantifying  
746 the h-current kinetics, tetrodotoxin (TTX, 1  $\mu$ M; Alomone Labs) to block voltage gated sodium  
747 currents, CoCl<sub>2</sub> (2mM; Sigma-Aldrich) to block voltage-sensitive calcium currents, and BaCl<sub>2</sub> (1mM;  
748 Sigma-Aldrich) to block inwardly rectifying potassium current were added to the bath solution.  
749 These recordings were taken both in the primary cell and in secondary L5 pyramidal cells, the data  
750 for both of which are presented in Figure 6.

751 **Spiking data.** To characterize general repetitive and post-inhibitory rebound spiking characteristics  
752 of human L5 cortical pyramidal cells, current clamp recordings were taken without TTX in secondary  
753 cells. The duration of the current pulse was 600 ms. This data, as presented in Table 1, was obtained  
754 from 147 cells.

#### 755 Histological methods and morphological reconstruction

756 During electrophysiological recording, biocytin (3-5 mg/ml) was allowed to diffuse into the patched  
757 neuron; after 20-45 min, the electrodes were slowly retracted under visual guidance to maintain the  
758 quality of the seal and staining. The slices were left for another 10-15 min in the recording chamber  
759 to washout excess biocytin from the extracellular space, then slices containing biocytin-filled cells  
760 were fixed in 4% paraformaldehyde in PBS for 24 hours at 4°C. The slices were washed at least  
761 4x10 min in PBS solution (0.1 mM). To reveal biocytin, slices were incubated in blocking serum (0.5%  
762 Bovine serum albumin (BSA), 0.5% milk powder) and 0.1% Triton X-100 in PBS for 1 hour at room  
763 temperature.

764 Finally, slices were incubated with streptavidin fluorescein (FITC) conjugated (1:400) (Thermo  
765 Fisher Scientific, Canada) on a shaker at 4°C for 12 hours. Then slices were washed at least 4x10  
766 min in PBS and mounted on the glass slide using moviol (Sigma-Aldrich). Imaging was done using  
767 a Zeiss LSM710 Multiphoton microscope. Cellular morphology was reconstructed using IMARIS  
768 software (Bitplane, Oxford instrument company). These steps were performed on the same neuron  
769 from which the current clamp traces were obtained, yielding the morphology shown in Figure 1.

770 The number of compartments in the final reconstruction of the primary human L5 pyramidal  
771 cell was 211. This was verified to be numerically appropriate in simulations performed.

#### 772 Subthreshold resonance

773 To assess the subthreshold resonance properties of L5 pyramidal cells, a frequency modulated  
774 sine wave current input (ZAP) was generated ranging from 1 to 20 Hz, lasting 20 s (*Hutcheon et al.,*  
775 *1996*) with a sampling rate of 10 kHz. This current waveform was then injected using the custom  
776 waveform feature of Clampex 9.2 (Axon Instruments, Molecular devices, USA). The subthreshold

777 current amplitude was adjusted to the maximal current that did not elicit spiking. The impedance  
778 curve resulting from this experiment was calculated as illustrated by *Puil et al. (1986)*. Summarized  
779 briefly, the impedance is calculated by dividing the power spectrum of the voltage trace by the  
780 power spectrum of the current trace under a ZAP protocol. Given the noisiness of these plots, in  
781 our presentations we also include a "smoothed" version of these curves simply calculated using the  
782 *smooth* function in MATLAB (*MATLAB, 2019*).

### 783 Frequency Dependent Gain

784 Following a similar methodology of *Higgs and Spain (2009)*, frequency dependent gain was com-  
785 puted using 30 trials (inter-trial interval = 20s) of a 2.5s duration current injection stimulus of frozen  
786 white noise convolved with a 3 ms square function (*Galán et al., 2008*). The variance of the noise,  
787 along with the tonic DC current, was chosen to elicit spike rates in the 5-10 Hz range, which is typical  
788 for cortical pyramidal cells (*Neske and Connors, 2016a,b*). The amplitude, or variance of the current  
789 injection stimulus was scaled to elicit spike rates of above 5 Hz the typical firing rate for cortical  
790 pyramidal cells (*Neske and Connors, 2016a,b*). In addition to increasing the noise variance, a steady  
791 amount of DC current was required (*Higgs and Spain, 2009*) to elicit spiking which was delivered as  
792 various amplitude steps added to the noisy current input. Peaks detected in the voltage time series  
793 with overshoot greater than 0 mV were taken to be the occurrence of an action potential. The time  
794 varying firing rate  $r(t)$  was given by:

$$r(t) = \begin{cases} \frac{1}{\Delta t} & \text{When spike detected} \\ 0 & \text{When no spike detected} \end{cases} \quad (1)$$

795 The gain was then calculated as:

$$G(f) = \frac{C_{sr}(f)}{C_{ss}(f)} \quad (2)$$

796 where the  $C$  functions represent the complex Fourier components of the stimulus-response corre-  
797 lation ( $sr$ ) and the stimulus autocorrelation ( $ss$ ) as defined in *Higgs and Spain (2009)*.

798 The noisy current is applied to the neuron 30 times, with the final  $G(f)$  curve the averaged  
799 response over these 30 trials (as presented in Figure 11Biii).

## 800 Construction of multi-compartment computational model of a human L5 cortical 801 pyramidal cell

802 The code containing the final model, as well as various tools to perform *in silico* experiments, can be  
803 found at <https://github.com/FKSkinnerLab/HumanL5NeuronModel>. We describe the development  
804 of this model below.

### 805 Ionic currents

806 The ion channel types and distributions in a previous detailed, multi-compartment model of a  
807 rodent L5 pyramidal cell model (*Hay et al., 2011*) were used as a basis for developing our human  
808 L5 pyramidal cell model. Thus the human L5 pyramidal cell model, before any adjustments or  
809 parameter optimization, consisted of the same 10 ion channel types producing the ionic currents  
810 present in the multi-compartment model. These are listed in the Results section.

### 811 Mathematical equations and parameter values

812 The mathematical equations describing the currents used a conductance-based formalism and  
813 kinetics for each of these channels in our human L5 pyramidal cell model was unaltered except for  
814 Ih, Na\_Ta, and SKv3\_1. These equations and kinetic parameters are given in the Methods of *Hay  
815 et al. (2011)*.

816 The Ih kinetics were fit from scratch to allow for any potential differences between rodent and  
817 human h-currents to be captured. We used a general mathematical model structure as used in



818 previous work to model h-current dynamics (Sekulić *et al.*, 2019) and included the parameters in  
 819 this model in our optimizations.

820 The equations for the h-current model are as follows:

$$\begin{aligned}
 i_{hcn} &= glh * (v - ehcn) \\
 glh &= glhbar * m \\
 \frac{dm}{dt} &= (m_{\infty} - m)/m_{\tau} \\
 m_{\infty} &= 1/(1 + e^{((v-vh)/k)}) \\
 m_{\tau} &= f + 1/(e^{-a-b*v} + e^{-c+d*v})
 \end{aligned} \tag{3}$$

821 where  $i_{hcn}$  is the current flow through the h-channels in mA/cm<sup>2</sup>,  $glh$  is the conductance in S/cm<sup>2</sup>,  
 822  $v$  is the voltage in mV,  $glhbar$  is the maximum conductance in S/cm<sup>2</sup> (an optimized parameter),  
 823  $m$  is the unitless gating variable,  $t$  is time (in ms),  $vh$  is the half-activation potential (an optimized  
 824 parameter, in mV),  $ehcn$  is the reversal potential for this channel (an optimized parameter, in mV)  $k$   
 825 is the slope of activation (an optimized parameter), and  $a, b, c, d$  and  $f$  are optimized parameters (in  
 826 ms).  $m_{\infty}$  is the steady-state activation function and  $m_{\tau}$  is the time constant of activation.

827 The changes to the Na\_Ta and SKv3\_1 ionic currents were simple “shifts” of the activation curves  
 828 to more hyperpolarized voltages, as necessitated to best replicate experimentally measured post-  
 829 inhibitory rebound and repetitive firing characteristics of human L5 cortical pyramidal cells as in  
 830 Table 1. The specific equations where these changes are implemented are shown below:

$$\begin{aligned}
 i_{NaTa} &= gNaTa * (v - ena) \\
 gNaTa &= gNaTabar * m * m * m * h \\
 \frac{dm}{dt} &= (m_{\infty} - m)/m_{\tau} \\
 \frac{dh}{dt} &= (h_{\infty} - h)/h_{\tau} \\
 m_{\alpha} &= \frac{0.182 * (v - (-38 - shift_{NaTa}))}{1 - (\exp(-(v - (-38 - shift_{NaTa}))/6))} \\
 m_{\beta} &= \frac{0.124 * (-v + (-38 - shift_{NaTa}))}{1 - (\exp(-(v + (-38 - shift_{NaTa}))/6))} \\
 m_{\tau} &= \frac{1}{m_{\alpha} + m_{\beta}} / qt \\
 m_{\infty} &= \frac{m_{\alpha}}{m_{\alpha} + m_{\beta}} \\
 h_{\alpha} &= \frac{-0.015 * (v - (-66 - shift_{NaTa}))}{1 - (\exp((v - (-38 - shift_{NaTa}))/6))} \\
 h_{\beta} &= \frac{-0.015 * (-v + (-66 - shift_{NaTa}))}{1 - (\exp((-v + (-38 - shift_{NaTa}))/6))} \\
 h_{\tau} &= \frac{1}{h_{\alpha} + h_{\beta}} / qt \\
 h_{\infty} &= \frac{h_{\alpha}}{h_{\alpha} + h_{\beta}}
 \end{aligned} \tag{4}$$

831 where  $qt$  is a local constant equal to  $2.3^{(34-21)/10}$  ;

$$\begin{aligned}
 i_{SKv3_1} &= SKv3_1 * (v - ek) \\
 gSKv3_1 &= gSKv3_1bar * m \\
 \frac{dm}{dt} &= (m_{\infty} - m)/m_{\tau} \\
 m_{\tau} &= \frac{0.2 * 20.000}{1 + \exp(((v - (-46.560 - shift_{SKv3_1}))/ - 44.140))} \\
 m_{\infty} &= \frac{1}{1 + \exp(((v - (18.700 - shift_{SKv3_1}))/ - 9.7))}
 \end{aligned} \tag{5}$$

832 The units of the  $i$  (current),  $g$  (conductance),  $v$  (voltage),  $e$  (reversal potential), and  $t$  (time) terms in  
 833 both of these equations are as given above for the h-current.  $ena$  refers to the reversal potential  
 834 of sodium and  $ek$  refers to the reversal potential of potassium, both of which are unaltered from  
 835 *Hay et al. (2011)*.  $m$  and  $h$  remain unitless gating variables in both equations. The *shift* parameters  
 836 have units of mV.

837 Values of the maximum conductances associated with each of these currents in the Hay model  
 838 and in our L5 Human model are given in Table 5.

**Table 5.** Parameters for the L5 Human model, with maximum conductances and passive properties compared to the Hay model.

| <b>Ionic Current</b>                  | <b>L5 Human Model<br/>maximum conductance<br/>(nS/cm<sup>2</sup>)</b> | <b>Hay Model<br/>maximum conductance<br/>(nS/cm<sup>2</sup>)</b> | <b>H-current<br/>Parameter</b>       | <b>L5 Human Model<br/>Value</b> |
|---------------------------------------|-----------------------------------------------------------------------|------------------------------------------------------------------|--------------------------------------|---------------------------------|
| Na_Ta (soma)                          | 2.2                                                                   | 2.04                                                             | a, ms                                | 23.428                          |
| Na_Ta (apical)                        | 0.001                                                                 | 0.0213                                                           | b, ms                                | 0.21756                         |
| Nap_Et2                               | 1e-06                                                                 | 0.00172                                                          | c, ms                                | 1.3881e-09                      |
| K_Pst                                 | 0.07                                                                  | 0.00223                                                          | d, ms                                | 0.082329                        |
| SKv3_1 (soma)                         | 0.04                                                                  | 0.693                                                            | f, ms                                | 1.9419e-09                      |
| SKv3_1 (apical)                       | 0.04                                                                  | 0.000261                                                         | k                                    | 8.0775                          |
| SK_E2 (soma)                          | 2.0964e-09                                                            | 0.0441                                                           | vh, mV                               | -90.963                         |
| SK_E2 (apical)                        | 2.0964e-09                                                            | 0.0012                                                           | ehcn, mV                             | -49.765                         |
| K_Tst                                 | 2e-05                                                                 | 0.0812                                                           | <b>"Shift" Parameter</b>             | <b>Value</b>                    |
| Ca_LVA (soma)                         | 0.00099587                                                            | 0.00343                                                          | <i>shift</i> <sub>Na_Ta'</sub> , mV  | -5                              |
| Ca_LVA (apical)                       | 0.00099587                                                            | 0.0187                                                           | <i>shift</i> <sub>SKv3_1'</sub> , mV | -10                             |
| Ca_HVA (soma)                         | 1.7838e-09                                                            | 9.92e-04                                                         |                                      |                                 |
| Ca_HVA (apical)                       | 1.7838e-09                                                            | 0.000555                                                         |                                      |                                 |
| Ih (soma, basilar)                    | 5.0723e-05                                                            | 2e-04                                                            |                                      |                                 |
| Im                                    | 2e-04                                                                 | 6.75e-05                                                         |                                      |                                 |
| <b>Passive Property<br/>Parameter</b> | <b>L5 Human Model<br/>Value</b>                                       | <b>Hay Model<br/>Value</b>                                       |                                      |                                 |
| Ra, ohm cm                            | 501.6                                                                 | 100                                                              |                                      |                                 |
| e_pas, mV                             | -84.325                                                               | -90                                                              |                                      |                                 |
| cm (soma), uF/cm <sup>2</sup>         | 1                                                                     | 1                                                                |                                      |                                 |
| cm (apical), uF/cm <sup>2</sup>       | 1.6226                                                                | 2                                                                |                                      |                                 |
| cm (basilar), uF/cm <sup>2</sup>      | 1.6226                                                                | 2                                                                |                                      |                                 |
| cm (axonal), uF/cm <sup>2</sup>       | 1.6226                                                                | 1                                                                |                                      |                                 |
| g_pas (soma), nS/cm <sup>2</sup>      | 1.75e-05                                                              | 3.38e-05                                                         |                                      |                                 |
| g_pas (apical), nS/cm <sup>2</sup>    | 1.75e-05                                                              | 5.89e-05                                                         |                                      |                                 |
| g_pas (basilar), nS/cm <sup>2</sup>   | 1.75e-05                                                              | 4.67e-05                                                         |                                      |                                 |
| g_pas (axonal), nS/cm <sup>2</sup>    | 1.75e-05                                                              | 3.25e-05                                                         |                                      |                                 |

839 Ion channel distributions

840 The locations of each of the 10 ion channel types in our human L5 pyramidal cell model are  
 841 summarized in Table 6, and utilize a classification of each compartment in the neuron model as part  
 842 of the soma, apical or basilar dendrites. With three exceptions, the ion channels were distributed  
 843 as in the model of *Hay et al. (2011)*.

844 The first and second exceptions are the calcium channels (Ca\_HVA and Ca\_LVA currents). A  
 845 feature of the *Hay et al. (2011)* model that required adjustment was the "calcium hot spot". As  
 846 described by *Hay et al. (2011)* and *Larkum and Zhu (2002)*, experimental evidence suggests a region  
 847 of increased calcium channel conductance near the "main bifurcation" in the apical dendrites in  
 848 rodent L5 pyramidal cells. The location of this bifurcation is closer to the soma in the morphology of

849 the human L5 pyramidal cell than that used in *Hay et al. (2011)* considering the difference between  
 850 human and rodent cell morphology, even in similar brain regions (*Beaulieu-Laroche et al., 2018*).  
 851 As such the region of this increased calcium activity, where the Ca\_LVA maximum conductance is  
 852 multiplied by 100 and the Ca\_HVA maximum conductance is multiplied by 10, is chosen to be on  
 853 the apical dendrite 360 to 600 microns from the soma.

854 The third exception are the h-channels. The function used to model the “exponential distribution”  
 855 of h-channels along the dendrites (*Kole et al., 2006; Ramaswamy and Markram, 2015; Beaulieu-*  
 856 *Laroche et al., 2018*) was also slightly adjusted from that presented in *Hay et al. (2011)* given the  
 857 distinct neuron morphology of the primary cell used here. For a given apical dendritic compartment,  
 858 the maximum conductance of the h-current,  $g_{lhbar}^*$ , is given by the following equation:

$$g_{lhbar}^* = g_{lhbar} \times \left( -0.8696 + 2.0870 \times e^{3.6161 \times \left( \frac{dist}{1000} \right)} \right) \quad (6)$$

859 where “dist” is the distance from the soma to the midway point of the given compartment, the  
 860 denominator of “1000” is chosen since this is the approximate distance from the soma to the  
 861 most distal dendrite, and “ $g_{lhbar}$ ” is the h-current maximum conductance value that is optimized.  
 862 “ $g_{lhbar}$ ” is also the value of the maximum conductance in the soma and basilar dendrites (i.e. the lh  
 863 maximum conductance is constant across all compartments in these regions).

**Table 6.** Summary of the distribution of ion channels in the differently classified compartments in the human L5 cortical pyramidal cell model.

| Type    | Location                                  | Ion Channel Distribution Notes                                                                                                                                  |
|---------|-------------------------------------------|-----------------------------------------------------------------------------------------------------------------------------------------------------------------|
| Na_Ta   | Soma, apical dendrites                    | Different maximum conductance values in soma and apical dendrites                                                                                               |
| Nap_Et2 | Soma                                      |                                                                                                                                                                 |
| K_Pst   | Soma                                      |                                                                                                                                                                 |
| SKv3_1  | Soma, apical dendrites                    |                                                                                                                                                                 |
| SK_E2   | Soma, apical dendrites                    |                                                                                                                                                                 |
| K_Tst   | Soma                                      |                                                                                                                                                                 |
| Ca_LVA  | Soma, apical dendrites                    | Exhibits “calcium hot spot” in apical dendrite (maximum conductance multiplied by 100 between 360 and 600 microns from soma)                                    |
| Ca_HVA  | Soma, apical dendrites                    | Follows “calcium hot spot” in apical dendrite (maximum conductance multiplied by 10 between 360 and 600 microns from soma)                                      |
| lh      | Soma, apical dendrites, basilar dendrites | Follows exponential distribution in apical dendrites (see Equation 6, where $g_{lhbar}$ is set to the lh maximum conductance in the soma and basilar dendrites) |
| lm      | Apical dendrites                          |                                                                                                                                                                 |

#### 864 **Details of the cycling fitting strategy**

865 Parameter optimization using NEURON’s Multiple Run Fitter algorithm

866 The first step in the “cycling” model development strategy (schematized in Figure 2) utilized NEU-  
 867 RON’s built in Multiple Run Fitter (MRF) algorithm for optimization (*Hines and Carnevale, 2001;*  
 868 *Carnevale and Hines, 2006*). This algorithm utilizes the PRAXIS method to minimize the error be-  
 869 tween the output (in this case, a voltage trace) of the model neuron in comparison to experimental  
 870 data obtained from an analogous protocol (*Brent, 1976*). Here, we fit the model to five different

871 current clamp protocols experimentally obtained from the primary neuron from which we obtained  
872 our human L5 cell morphology. As the experimental current clamp data was obtained in the  
873 presence of TTX, all sodium conductances were set to zero and not altered in this step. Additionally,  
874 the potassium channel currents primarily involved in action potential generation, K\_Pst and SKv3\_1,  
875 were omitted from the optimization and “hand-tuned” in the second step of the cycle.

876 We chose to use three hyperpolarizing current clamp traces, with -400 pA, -350 pA, and -300 pA  
877 current amplitudes, because at these hyperpolarized voltages it was reasonable to assume that the  
878 h-current was primarily responsible for the voltage changes (*Toledo-Rodriguez et al., 2004*). This  
879 allowed us to accurately fit not only the h-current maximum conductance, but also its kinetics (see  
880 Equation 3 above).

881 A hyperpolarizing current step with a small (-50 pA) magnitude was chosen to constrain the  
882 passive properties, as near the resting membrane potential it is primarily these properties that  
883 dictate the voltage responses (“charging” and “discharging”) to a current clamp protocol. We note  
884 that this trace does not represent a perfectly “passive” neuron, as some conductances (such as those  
885 due to the h-current) are active, albeit minimally, at mildly hyperpolarized voltages (only the sodium  
886 channels were directly blocked in this protocol, via the application of TTX). Nonetheless, given  
887 that our model fit this current clamp data well, and also mimicked the “charging” and “discharging”  
888 portions of all the current clamp protocols included in the optimization, we are confident that we  
889 accurately approximated the passive properties of our particular human L5 pyramidal neuron. The  
890 final passive properties are shown in Table 5 along with those of a rodent L5 cortical pyramidal  
891 cell model of *Hay et al. (2011)*. The passive properties include  $R_a$  (the axial resistivity in ohm cm),  
892  $e_{pas}$  (the passive reversal potential in mV),  $cm$  (the specific capacitance in  $\mu F/cm^2$ ), and  $g_{pas}$  (the  
893 passive conductance in  $S/cm^2$ ).

894 Finally, a depolarizing current step (100 pA) was chosen to ensure the model was not “overfit”  
895 to the hyperpolarized data. Early in the modeling process, we recognized that a “best fit” of the  
896 depolarizing current clamp data would involve minimizing the values of the K\_Pst and SKv3\_1  
897 maximum conductances to the point that action potential generation would not be viable. It  
898 is for this reason that the “cycling technique” was developed to ensure that reasonable spiking  
899 characteristics were achieved by the model while also minimizing these conductances as much as  
900 possible to best fit the depolarizing current clamp trace.

901 We note that, in the process of designing this modeling technique, we chose not to use ev-  
902 ery current clamp recording available to us, but instead chose a moderate number of current  
903 clamp recordings for use in the optimization. This is due to computational considerations and a  
904 desire for the modeling technique to be potentially applicable in other settings using reasonable  
905 computational resources and computational time spent.

906 A useful tool provided by NEURON’s MRF is the ability to differentially “weigh” portions of  
907 the traces in the computation of the error value we sought to minimize. Given the focus of this  
908 study was on uncovering dynamics of the h-current, we more heavily weighed the portions of the  
909 voltage trace in which this channel most affected the voltage, namely the initial “sag” following a  
910 hyperpolarizing current steps and the “rebound” in voltage when this inhibition is released. We also  
911 chose portions of the voltage trace to emphasize in the error calculation in order to ensure the  
912 model cell closely approximated the resting membrane potential observed experimentally, as well  
913 as matched the “charging” and “discharging” features heavily influenced by passive properties.

914 We note that these differential “weights” were chosen only after a rigorous exploration of how  
915 these choices affected the overall model fit; indeed, this choice yielded a model that both qualita-  
916 tively and quantitatively best fit the experimentally-observed behavior of our human L5 cortical  
917 pyramidal cell. We also note that the possibility that our final parameters represented a “local”,  
918 rather than “global” minimum in the optimization was investigated by running the optimization with  
919 a variety of initial conditions; the solution with the minimum error from all of these trials is the one  
920 presented here.

## 921 Matching of spiking features

922 After optimizing the parameters using MRF, we then tuned the sodium and potassium conductances  
923 involved in action potential generation by hand in order to achieve PIR and repetitive spiking  
924 behaviors reasonably approximating that seen in experiments (and summarized in Table 1). As  
925 described above, we sought to achieve this reasonable behavior while minimizing the relevant  
926 potassium conductances so as to best fit the 100 pA current clamp trace.

927 In this step, we also found that a “shift” in the activation curve for Na<sub>Ta</sub> (see Equation 4 above)  
928 was necessary to achieve PIR spiking as seen experimentally. We sought to minimize this shift for  
929 simplicity, but also because a side effect of this leftward shift was an increase in repetitive firing  
930 frequency that approached the upper limit of what was biologically reasonable. We note that the  
931 final shift of -5 mV kept the dynamics of our sodium channel well within a reasonable range (for  
932 example, the sodium channel used in the model presented by *Ascoli et al. (2010)* has a significantly  
933 more leftward shifted sodium activation curve than our model).

934 Finally, in order to prevent biologically unrealistic depolarization blocks from occurring in our  
935 model (since these are not seen experimentally), we shifted the activation curve for SKv3\_1 more  
936 leftward (-10 mV) than the sodium channel (see Equation 5 above). This technique for preventing  
937 depolarization block in computational models has been previously suggested by *Bianchi et al.*  
938 *(2012)*.

## 939 Final model parameters

940 The “cycling” mechanism described in detail above was run until there was no significant improve-  
941 ment in the quantitative (i.e. the “error” in the optimization step) or qualitative (i.e. the spiking  
942 characteristics) measurement of model accuracy in either step of the cycle. The resulting parameter  
943 choices are summarized in Table 5, shown together with those of a rodent L5 pyramidal cell as  
944 developed by *Hay et al. (2011)*.

945 The input resistance of the final model was 82.48 Mohm which compares favourably with the  
946 experimental data from the primary cell which yields an input resistance of 82.08 Mohm. This  
947 correspondence is as expected given the accurate fits that drove the modeling process. These  
948 values were determined by performing a linear fit (with a fixed y-intercept of 0) between an input  
949 current (“x value”) and the resulting steady-state change in voltage (“y value”) for input currents of  
950 -200, -150, -100, -50, 0, 50, and 100 mV.

951 The membrane time constant of our final model was 36.76 ms, which compares favourably  
952 with the experimental data from the primary cell which yields a membrane time constant of 32.69  
953 ms. Again, this correspondence is as expected given the accurate fits that drove the modeling  
954 process. These values were determined by fitting a double-exponential equation ( $a * e^{b*x} + c * e^{d*x}$ )  
955 to the discharging portion of the voltage trace in response to the -50 pA current clamp, with the  
956 membrane time constant being the constant corresponding with the “slow” exponent (i.e. the value  
957 of  $b$  or  $d$  that was smaller in magnitude).

## 958 Parameter constraints

959 Moderate constraints were placed on the range of certain parameters in order to ensure that,  
960 in finding the best “fit” to the data, these values did not enter a regime known to be biologically  
961 unlikely or that would lead to unreasonable spiking characteristics. In order to preserve reasonable  
962 spiking behavior, the maximum value for the Ca<sub>LVA</sub> maximum conductance was set to 0.001  
963 nS/cm<sup>2</sup>, the maximum value for the Ca<sub>HVA</sub> maximum conductance was set to 1e-05 nS/cm<sup>2</sup>, and  
964 the minimum value of the I<sub>m</sub> maximum conductance was set to 0.0002 nS/cm<sup>2</sup>. These values were  
965 determined after rigorous investigation of the effects of these maximum conductances on the  
966 spiking properties.

967 Further constraints were placed on the passive properties of the neuron to make sure the  
968 neuron not only matched “charging” and “discharging” properties in the current clamp data, but also  
969 reasonably approximated the resistance and membrane time constant values from the experimental

970 data (*Chameh et al., 2019*). These limits were as follows: the axial resistance ( $R_a$ ) was constrained  
971 between 0 and 1000 ohm cm; the membrane capacitance (cm) outside the soma was constrained  
972 between 1 and 1.8  $\mu\text{F}/\text{cm}^2$ ; the passive reversal potential ( $e_{\text{pas}}$ ) was constrained between -90  
973 and -80 mV; and the passive conductance ( $g_{\text{pas}}$ ) was constrained between  $1.75\text{e-}05$  and  $2.5\text{e-}05$   
974  $\text{nS}/\text{cm}^2$ .

### 975 ***In silico* experiments**

976 The usefulness of the model presented here lies not only in its ability to well “fit” the constraining  
977 data, but the insights it provides when subjected to *in silico* versions of experiments. Two common  
978 protocols used to assess sub- and suprathreshold neural activity were performed *in silico* on our  
979 model neuron to evaluate the ability of our neuron model to capture an “essence” of the functional  
980 capacity of the neuron, and this data was compared to available results from analogous *in vitro*  
981 experiments.

### 982 ZAP function

983 A “ZAP function”, a sinusoidal function whose frequency changes linearly over a given range, has  
984 been used to assess the impedance amplitude profile in a variety of engineering settings for over  
985 30 years (*Puil et al., 1986*), including in the assessment of subthreshold resonance properties in  
986 neurons (*Leung and Yu, 1998*). In this study, the ZAP function protocol was motivated by that used  
987 in the corresponding experimental data (*Chameh et al., 2019*): the current injection lasted for 20  
988 seconds with its frequency ranging from 0 to 20 Hz. The current was injected into the soma of the  
989 model, just as the experimental protocol was somatic. The amplitude of this input was 0.03 pA in  
990 all *in silico* protocols.

991 We note that, in Figure 7A, only a single experiment is shown. As the ZAP current is set and the  
992 model neuron is deterministic (i.e. will exhibit the same response to the same input in every case),  
993 no averaging or statistical measures were necessary for this protocol.

994 We also note that, in determining the “resonant frequency” highlighted in Tables 2, 3, and 4, we  
995 only consider frequencies greater than 1 Hz, as a peak below 1 Hz can arise in these computational  
996 experiments as an artifact potentially driven by initial conditions, but does not indicate a biologically  
997 interesting frequency preference of the neuron. The peak values displayed in these tables were  
998 found simply by determining the frequency corresponding to the maximum impedance value (in  
999 the raw, rather than “smoothed”, data).

1000 The code generating this current was obtained from the NEURON (*Carnevale and Hines, 2006*)  
1001 website via the following link: <http://www.neuron.yale.edu/ftp/ted/neuron/izap.zip>.

1002 Frequency-dependent gain calculated via injection of Gaussian-filtered white noise  
1003 To evaluate whether the suprathreshold dynamics of the model neuron matched experimental  
1004 findings, we evaluated the frequency-dependent gain of the model by injecting Gaussian-filtered  
1005 white noise, with varying DC current shifts, to the soma. This technique is described above in  
1006 relation to the experimental calculation of this feature (*Higgs and Spain, 2009*).

1007 In this implementation, the noise had a 40 pA gain, a tau value of 3 ms, and DC shifts were  
1008 chosen so that the firing rate of the neuron fell within the general theta range (here, 4-10 Hz).  
1009 The “noise” was generated via an in-house Matlab file, then imported into NEURON via the tools  
1010 associated with the “vector” data type. The DC shift was added to the noise within the NEURON  
1011 code, and then this current profile was injected into the soma of the model neuron (to match the  
1012 somatic experiments of *Chameh et al. (2019)*). The voltage of the model neuron over time was  
1013 outputted and then processed to generate an impedance plot utilizing additional in-house Matlab  
1014 code implementing the measure presented in *Higgs and Spain (2009)* (described in detail above).

1015 The plots presented in Figure 11A utilize a log-scale on the x-axis, again to match what is seen in  
1016 analogous *in vitro* experiments. Figure 11Ai-ii are examples from a single trial, while Figure 11Aiii is  
1017 an average over 60 trials with independently generated noisy components of the current. The gain

1018 profiles were generated via in-house Matlab scripts that are included at  
1019 <https://github.com/FKSkinnerLab/HumanL5NeuronModel>.

### 1020 **Implementation of other models**

1021 Models from two other works, that of *Hay et al. (2011)* and *Kalmbach et al. (2018)*, were imple-  
1022 mented and used for comparison purposes.

1023 The *Hay et al. (2011)* model is accessible via ModelDB at [senselab.med.yale.edu/ModelDB](https://senselab.med.yale.edu/ModelDB)  
1024 (Accession:139653). We implemented this model directly using the code available via this source. In  
1025 this work we utilized the model that is “constrained both for BAC firing and Current Step Firing”,  
1026 which is dictated by specifically utilizing the “L5PCbiophys3.hoc” file.

1027 The *Kalmbach et al. (2018)* model is available via GitHub at [https://github.com/AllenInstitute/](https://github.com/AllenInstitute/human_neuron_lh)  
1028 [human\\_neuron\\_lh](https://github.com/AllenInstitute/human_neuron_lh). The morphology of the model neuron and the “shifted” version of the *Kole*  
1029 *et al. (2006)* h-current model that are used were directly downloaded from this repository, and the  
1030 passive properties and h-current maximum conductance values as defined in the code repository  
1031 were instantiated via basic NEURON code. This “shifted” version of the *Kole et al. (2006)* model is  
1032 included below:

$$\begin{aligned}i_{hcn} &= g_{lh} * (v - e_{hcn}) \\g_{lh} &= g_{lhbar} * m \\ \frac{dm}{dt} &= (m_{\infty} - m)/m_{\tau} \\ m_{\alpha} &= 0.001 * 6.43 * (v - 20 + 154.3)/(\exp((v - 20 + 154.9)/11.9) - 1) \\ m_{\beta} &= 0.001 * 193 * \exp(v/33.1) \\ m_{\infty} &= \frac{m_{\alpha}}{m_{\alpha} + m_{\beta}} \\ m_{\tau} &= \frac{1}{m_{\alpha} + m_{\beta}}\end{aligned} \tag{7}$$

1033 The “-20” term in the  $m_{\alpha}$  equation is the “shift” from *Kole et al. (2006)*. The parameters dictating the  
1034 model which has non-uniform passive properties and uniformly distributed h-channels (amongst  
1035 the soma, apical, and basilar dendrites) are given in Table 7. We ensured our implementation of  
1036 this model was appropriate by directly replicating Figure 7B of *Kalmbach et al. (2018)* with this  
1037 implementation.

1038 In both cases, replacing the default rodent-motivated h-current model with the h-current model  
1039 generated in this study was a straightforward matter of changing which channel was added into the  
1040 NEURON model. Doing so ensured that the *only* change in these “hybrid” models was to the kinetics  
1041 of the h-current (i.e the h-channel distribution and maximum conductance, as well as all other  
1042 features, were the same as in the “model backbone”). All code involved in the implementations of  
1043 these models is available at <https://github.com/FKSkinnerLab/HumanL5NeuronModel>.

**Table 7.** Parameters used in implementation of the human L3 cortical pyramidal cell model of *Kalmbach et al. (2018)*.

| Parameter                                     | Value       |
|-----------------------------------------------|-------------|
| g <sub>lh</sub> , nS/cm <sup>2</sup>          | 0.0001      |
| R <sub>a</sub> (soma), ohm cm                 | 304.425     |
| R <sub>a</sub> (apical), ohm cm               | 393.534     |
| R <sub>a</sub> (basilar), ohm cm              | 104.085     |
| R <sub>a</sub> (axonal), ohm cm               | 331.682     |
| c <sub>m</sub> (soma), uF/cm <sup>2</sup>     | 2.72372     |
| c <sub>m</sub> (apical), uF/cm <sup>2</sup>   | 2.91188     |
| c <sub>m</sub> (basilar), uF/cm <sup>2</sup>  | 1.81391     |
| c <sub>m</sub> (axonal), uF/cm <sup>2</sup>   | 1.75213     |
| g <sub>pas</sub> (soma) nS/cm <sup>2</sup>    | 1.90172e-05 |
| g <sub>pas</sub> (apical) nS/cm <sup>2</sup>  | 3.02942e-04 |
| g <sub>pas</sub> (basilar) nS/cm <sup>2</sup> | 4.46002e-06 |
| g <sub>pas</sub> (axonal) nS/cm <sup>2</sup>  | 4.79653e-04 |
| e <sub>pas</sub> (soma), mV                   | -79.6515    |
| e <sub>pas</sub> (apical), mV                 | -84.5477    |
| e <sub>pas</sub> (basilar), mV                | -86.6748    |
| e <sub>pas</sub> (axonal), mV                 | -65.3528    |

## 1044 Acknowledgments

1045 We thank Happy Inibhunu for applying new data visualization techniques to this model that helped  
1046 to shape the presentation of these results.

## 1047 References

- 1048 **Akam T, Kullmann DM.** Oscillatory multiplexing of population codes for selective communication in the  
1049 mammalian brain. *Nature Reviews Neuroscience*. 2014; 15(2):111–122. doi: 10.1038/nrn3668.
- 1050 **Almog M, Korngreen A.** A quantitative description of dendritic conductances and its application to den-  
1051 dritic excitation in layer 5 pyramidal neurons. *Journal of Neuroscience*. 2014; 34(1):182–196. doi:  
1052 [10.1523/JNEUROSCI.2896-13.2014](https://doi.org/10.1523/JNEUROSCI.2896-13.2014).
- 1053 **Almog M, Korngreen A.** Is realistic neuronal modeling realistic? *Journal of neurophysiology*. 2016; 116(5):2180–  
1054 2209. doi: [10.1152/jn.00360.2016](https://doi.org/10.1152/jn.00360.2016).
- 1055 **Anastassiou CA, Perin R, Markram H, Koch C.** Ephaptic coupling of cortical neurons. *Nature neuroscience*.  
1056 2011; 14(2):217. doi: [10.1038/nn.2727](https://doi.org/10.1038/nn.2727).
- 1057 **Ascoli GA, Gasparini S, Medinilla V, Migliore M.** Local control of postinhibitory rebound spiking in CA1 pyramidal  
1058 neuron dendrites. *Journal of Neuroscience*. 2010; 30(18):6434–6442. doi: [10.1523/JNEUROSCI.4066-09.2010](https://doi.org/10.1523/JNEUROSCI.4066-09.2010).
- 1059 **Beaulieu-Laroche L, Toloza EH, van der Goes MS, Lafourcade M, Barnagian D, Williams ZM, Eskandar EN, Frosch  
1060 MP, Cash SS, Harnett MT.** Enhanced dendritic compartmentalization in human cortical neurons. *Cell*. 2018;  
1061 175(3):643–651. doi: [10.1016/j.cell.2018.08.045](https://doi.org/10.1016/j.cell.2018.08.045).
- 1062 **Bianchi D, Marasco A, Limongiello A, Marchetti C, Marie H, Tirozzi B, Migliore M.** On the mechanisms underlying  
1063 the depolarization block in the spiking dynamics of CA1 pyramidal neurons. *Journal of computational  
1064 neuroscience*. 2012; 33(2):207–225. doi: 10.1007/s10827-012-0383-y.
- 1065 **Biel M, Wahl-Schott C, Michalakis S, Zong X.** Hyperpolarization-Activated Cation Channels: From Genes to  
1066 Function. *Physiological Reviews*. 2009 Jul; 89(3):847–885. doi: [10.1152/physrev.00029.2008](https://doi.org/10.1152/physrev.00029.2008).
- 1067 **Brent R.** A new algorithm for minimizing a function of several variables without calculating derivatives. *Algo-  
1068 rithms for minimization without derivatives*. 1976; p. 200–248.



- 1069 **Carnevale NT**, Hines ML. The NEURON book. Cambridge University Press; 2006.
- 1070 **Chameh HM**, Wang L, Rich S, Zhang L, Carlen PL, Tripathy SJ, Valiante TA. Sag currents are a major contributor  
1071 to human pyramidal cell intrinsic differences across cortical layers and between individuals. *bioRxiv*. 2019; p.  
1072 748988. doi: 10.1101/748988.
- 1073 **Chen S**, Wang J, Siegelbaum SA. Properties of hyperpolarization-activated pacemaker current defined by  
1074 coassembly of HCN1 and HCN2 subunits and basal modulation by cyclic nucleotide. *The Journal of general*  
1075 *physiology*. 2001; 117(5):491–504. doi: 10.1085/jgp.117.5.491.
- 1076 **Dembrow NC**, Chitwood RA, Johnston D. Projection-specific neuromodulation of medial prefrontal cortex  
1077 neurons. *Journal of Neuroscience*. 2010; 30(50):16922–16937. doi: 10.1523/JNEUROSCI.3644-10.2010.
- 1078 **Dong HW**. The Allen reference atlas: A digital color brain atlas of the C57Bl/6J male mouse. John Wiley & Sons  
1079 Inc; 2008.
- 1080 **Dyhrfeld-Johnsen J**, Morgan RJ, Soltesz I. Double trouble? Potential for hyperexcitability following both  
1081 channelopathic up-and downregulation of Ih in epilepsy. *Frontiers in neuroscience*. 2009; 3:5. doi:  
1082 10.3389/neuro.01.005.2009.
- 1083 **Einevoll GT**, Destexhe A, Diesmann M, Grün S, Jirsa V, Kamps Md, Migliore M, Ness TV, Plesser HE,  
1084 Schürmann F. The Scientific Case for Brain Simulations. *Neuron*. 2019 May; 102(4):735–744. doi:  
1085 10.1016/j.neuron.2019.03.027.
- 1086 **Eyal G**, Verhoog MB, Testa-Silva G, Deitcher Y, Benavides-Piccione R, DeFelipe J, De Kock CP, Mansvelder H, Segev  
1087 I. Human cortical pyramidal neurons: From spines to spikes via models. *Frontiers in cellular neuroscience*.  
1088 2018; 12:181. doi: 10.3389/fncel.2018.00181.
- 1089 **Eyal G**, Verhoog MB, Testa-Silva G, Deitcher Y, Lodder JC, Benavides-Piccione R, Morales J, DeFelipe J, de Kock CP,  
1090 Mansvelder HD, et al. Unique membrane properties and enhanced signal processing in human neocortical  
1091 neurons. *Elife*. 2016; 5:e16553. doi: 10.7554/eLife.16553.
- 1092 **Farinella M**, Ruedt DT, Gleeson P, Lanore F, Silver RA. Glutamate-bound NMDARs arising from in vivo-like  
1093 network activity extend spatio-temporal integration in a L5 cortical pyramidal cell model. *PLoS computational*  
1094 *biology*. 2014; 10(4):e1003590. doi: 10.1371/journal.pcbi.1003590.
- 1095 **Florez CM**, McGinn RJ, Lukankin V, Marwa I, Sugumar S, Dian J, Hazrati LN, Carlen PL, Zhang L, Valiante TA. In  
1096 Vitro Recordings of Human Neocortical Oscillations. *Cerebral Cortex*. 2013 Sep; p. bht235. doi: 10.1093/cer-  
1097 cor/bht235.
- 1098 **Fries P**. A mechanism for cognitive dynamics: neuronal communication through neuronal coherence. *Trends in*  
1099 *cognitive sciences*. 2005; 9(10):474–480. doi: 10.1016/j.tics.2005.08.011.
- 1100 **Galán RF**, Ermentrout GB, Urban NN. Optimal time scale for spike-time reliability: theory, simulations, and  
1101 experiments. *Journal of neurophysiology*. 2008; 99(1):277–283. doi: 10.1152/jn.00563.2007.
- 1102 **Gaillard JM**, Taylor AL, Schulz DJ, Marder E. Functional consequences of animal-to-animal variation in circuit  
1103 parameters. *Nature neuroscience*. 2009; 12(11):1424. doi: 10.1038/nn.2404.
- 1104 **Golowasch J**, Goldman MS, Abbott L, Marder E. Failure of averaging in the construction of a conductance-based  
1105 neuron model. *Journal of Neurophysiology*. 2002; 87(2):1129–1131. doi: 10.1152/jn.00412.2001.
- 1106 **Gouwens NW**, Berg J, Feng D, Sorensen SA, Zeng H, Hawrylycz MJ, Koch C, Arkhipov A. Systematic generation of  
1107 biophysically detailed models for diverse cortical neuron types. *Nature communications*. 2018; 9(1):710. doi:  
1108 10.1038/s41467-017-02718-3.
- 1109 **Hanslmayr S**, Axmacher N, Inman CS. Modulating Human Memory via Entrainment of Brain Oscillations. *Trends*  
1110 *in Neurosciences*. 2019 Jul; 42(7):485–499. doi: 10.1016/j.tins.2019.04.004.
- 1111 **Harnett MT**, Magee JC, Williams SR. Distribution and function of HCN channels in the apical dendritic tuft of neo-  
1112 cortical pyramidal neurons. *Journal of Neuroscience*. 2015; 35(3):1024–1037. doi: 10.1523/JNEUROSCI.2813-  
1113 14.2015.
- 1114 **Hay E**, Hill S, Schürmann F, Markram H, Segev I. Models of neocortical layer 5b pyramidal cells capturing a wide  
1115 range of dendritic and perisomatic active properties. *PLoS computational biology*. 2011; 7(7):e1002107. doi:  
1116 10.1371/journal.pcbi.1002107.

- 1117 **Higgs MH**, Spain WJ. Conditional bursting enhances resonant firing in neocortical layer 2–3 pyramidal neurons.  
1118 *Journal of Neuroscience*. 2009; 29(5):1285–1299. doi: [10.1523/JNEUROSCI.3728-08.2009](https://doi.org/10.1523/JNEUROSCI.3728-08.2009).
- 1119 **Hines ML**, Carnevale NT. NEURON: a tool for neuroscientists. *The neuroscientist*. 2001; 7(2):123–135. doi:  
1120 [10.1177/107385840100700207](https://doi.org/10.1177/107385840100700207).
- 1121 **Hodge RD**, Bakken TE, Miller JA, Smith KA, Barkan ER, Graybuck LT, Close JL, Long B, Johansen N, Penn O, Yao  
1122 Z, Eggermont J, Höllt T, Levi BP, Shehata SI, Aevermann B, Beller A, Bertagnolli D, Brouner K, Casper T, et al.  
1123 Conserved cell types with divergent features in human versus mouse cortex. *Nature*. 2019 Aug; p. 1–8. doi:  
1124 [10.1038/s41586-019-1506-7](https://doi.org/10.1038/s41586-019-1506-7).
- 1125 **Hu H**, Vervaeke K, Graham LJ, Storm JF. Complementary Theta Resonance Filtering by Two Spatially Segregated  
1126 Mechanisms in CA1 Hippocampal Pyramidal Neurons. *The Journal of Neuroscience*. 2009 Nov; 29(46):14472–  
1127 14483. doi: [10.1523/JNEUROSCI.0187-09.2009](https://doi.org/10.1523/JNEUROSCI.0187-09.2009).
- 1128 **Hu H**, Vervaeke K, Storm JF. Two forms of electrical resonance at theta frequencies, generated by M-current,  
1129 h-current and persistent Na<sup>+</sup> current in rat hippocampal pyramidal cells. *The Journal of physiology*. 2002;  
1130 545(3):783–805. doi: [10.1113/jphysiol.2002.029249](https://doi.org/10.1113/jphysiol.2002.029249).
- 1131 **Hutcheon B**, Miura RM, Puil E. Subthreshold membrane resonance in neocortical neurons. *Journal of neuro-*  
1132 *physiology*. 1996; 76(2):683–697. doi: [10.1152/jn.1996.76.2.683](https://doi.org/10.1152/jn.1996.76.2.683).
- 1133 **Hutcheon B**, Yarom Y. Resonance, oscillation and the intrinsic frequency preferences of neurons. *Trends in*  
1134 *Neurosciences*. 2000 May; 23(5):216–222. doi: [10.1016/S0166-2236\(00\)01547-2](https://doi.org/10.1016/S0166-2236(00)01547-2).
- 1135 **Jones AR**, Overly CC, Sunkin SM. The Allen brain atlas: 5 years and beyond. *Nature Reviews Neuroscience*. 2009;  
1136 10(11):821. doi: [10.1038/nrn2722](https://doi.org/10.1038/nrn2722).
- 1137 **Kalmbach BE**, Buchin A, Long B, Close J, Nandi A, Miller JA, Bakken TE, Hodge RD, Chong P, de Frates R, et al.  
1138 h-Channels Contribute to Divergent Intrinsic Membrane Properties of Supragranular Pyramidal Neurons in  
1139 Human versus Mouse Cerebral Cortex. *Neuron*. 2018; 100(5):1194–1208. doi: [10.1016/j.neuron.2018.10.012](https://doi.org/10.1016/j.neuron.2018.10.012).
- 1140 **Keren N**, Bar-Yehuda D, Korngreen A. Experimentally guided modelling of dendritic excitability in rat neocortical  
1141 pyramidal neurones. *The Journal of physiology*. 2009; 587(7):1413–1437. doi: [10.1113/jphysiol.2008.167130](https://doi.org/10.1113/jphysiol.2008.167130).
- 1142 **Kispersky TJ**, Fernandez FR, Economo MN, White JA. Spike resonance properties in hippocampal O-LM  
1143 cells are dependent on refractory dynamics. *Journal of Neuroscience*. 2012; 32(11):3637–3651. doi:  
1144 [10.1523/JNEUROSCI.1361-11.2012](https://doi.org/10.1523/JNEUROSCI.1361-11.2012).
- 1145 **Köhling R**, Avoli M. Methodological approaches to exploring epileptic disorders in the human brain in vitro.  
1146 *Journal of neuroscience methods*. 2006; 155(1):1–19. doi: [10.1016/j.jneumeth.2006.04.009](https://doi.org/10.1016/j.jneumeth.2006.04.009).
- 1147 **Kole MH**, Hallermann S, Stuart GJ. Single Ih channels in pyramidal neuron dendrites: properties, distri-  
1148 bution, and impact on action potential output. *Journal of Neuroscience*. 2006; 26(6):1677–1687. doi:  
1149 [10.1523/JNEUROSCI.3664-05.2006](https://doi.org/10.1523/JNEUROSCI.3664-05.2006).
- 1150 **Kostopoulos G**, Drapeau C, Avoli M, Olivier A, Villemeure JG. Endogenous adenosine can reduce epileptiform  
1151 activity in the human epileptogenic cortex maintained in vitro. *Neuroscience letters*. 1989; 106(1-2):119–124.  
1152 doi: [10.1016/0304-3940\(89\)90212-7](https://doi.org/10.1016/0304-3940(89)90212-7).
- 1153 **Larkum ME**, Nevian T, Sandler M, Polsky A, Schiller J. Synaptic integration in tuft dendrites of layer 5 pyramidal  
1154 neurons: a new unifying principle. *Science*. 2009; 325(5941):756–760. doi: [10.1126/science.1171958](https://doi.org/10.1126/science.1171958).
- 1155 **Larkum ME**, Zhu JJ. Signaling of layer 1 and whisker-evoked Ca<sup>2+</sup> and Na<sup>+</sup> action potentials in distal and  
1156 terminal dendrites of rat neocortical pyramidal neurons in vitro and in vivo. *Journal of neuroscience*. 2002;  
1157 22(16):6991–7005. doi: [10.1523/JNEUROSCI.22-16-06991.2002](https://doi.org/10.1523/JNEUROSCI.22-16-06991.2002).
- 1158 **Larkum ME**, Zhu JJ, Sakmann B. A new cellular mechanism for coupling inputs arriving at different cortical  
1159 layers. *Nature*. 1999; 398(6725):338. doi: [doi.org/10.1038/18686](https://doi.org/10.1038/18686).
- 1160 **Leung LS**, Yu HW. Theta-frequency resonance in hippocampal CA1 neurons in vitro demonstrated by sinusoidal  
1161 current injection. *Journal of neurophysiology*. 1998; 79(3):1592–1596. doi: [10.1152/jn.1998.79.3.1592](https://doi.org/10.1152/jn.1998.79.3.1592).
- 1162 **Mansouri A**, Fallah A, Valiante TA. Determining surgical candidacy in temporal lobe epilepsy. *Epilepsy research*  
1163 *and treatment*. 2012; 2012. doi: [10.1155/2012/706917](https://doi.org/10.1155/2012/706917).

- 1164 **Marder E**, Goaillard JM. Variability, compensation and homeostasis in neuron and network function. *Nature*  
1165 *Reviews Neuroscience*. 2006; 7(7):563. doi: 10.1038/nrn1949.
- 1166 **MATLAB**. version 9.6.0 (R2019a). Natick, Massachusetts: The MathWorks Inc.; 2019.
- 1167 **McGinn RJ**, Valiante TA. Phase–Amplitude Coupling and Interlaminar Synchrony Are Correlated in Human  
1168 Neocortex. *The Journal of Neuroscience*. 2014 Nov; 34(48):15923–15930. doi: 10.1523/JNEUROSCI.2771-  
1169 14.2014.
- 1170 **Mohan H**, Verhoog MB, Doreswamy KK, Eyal G, Aardse R, Lodder BN, Goriounova NA, Asamoah B, Brakspear  
1171 AC, Groot C, et al. Dendritic and axonal architecture of individual pyramidal neurons across layers of adult  
1172 human neocortex. *Cerebral Cortex*. 2015; 25(12):4839–4853. doi: 10.1093/cercor/bhv188.
- 1173 **Molnár G**, Oláh S, Komlósi G, Füle M, Szabadics J, Varga C, Barzó P, Tamás G. Complex events initiated by individ-  
1174 ual spikes in the human cerebral cortex. *PLoS biology*. 2008; 6(9):e222. doi: 10.1371/journal.pbio.0060222.
- 1175 **Neske GT**, Connors BW. Distinct roles of SOM and VIP interneurons during cortical up states. *Frontiers in Neural*  
1176 *Circuits*. 2016; 10:52. doi: 10.3389/fncir.2016.00052.
- 1177 **Neske GT**, Connors BW. Synchronized gamma-frequency inhibition in neocortex depends on excitatory-  
1178 inhibitory interactions but not electrical synapses. *Journal of neurophysiology*. 2016; 116(2):351–368. doi:  
1179 10.1152/jn.00071.2016.
- 1180 **Puil E**, Gimbarzevsky B, Miura R. Quantification of membrane properties of trigeminal root ganglion neurons in  
1181 guinea pigs. *Journal of Neurophysiology*. 1986; 55(5):995–1016. doi: 10.1152/jn.1986.55.5.995.
- 1182 **Ramaswamy S**, Markram H. Anatomy and physiology of the thick-tufted layer 5 pyramidal neuron. *Frontiers in*  
1183 *cellular neuroscience*. 2015; 9:233. doi: 10.3389/fncel.2015.00233.
- 1184 **Ransdell JL**, Nair SS, Schulz DJ. Neurons within the same network independently achieve conserved output by  
1185 differentially balancing variable conductance magnitudes. *Journal of Neuroscience*. 2013; 33(24):9950–9956.  
1186 doi: 10.1523/JNEUROSCI.1095-13.2013.
- 1187 **Roth A**, Bahl A. Divide et impera: optimizing compartmental models of neurons step by step. *The Journal of*  
1188 *physiology*. 2009; 587(7):1369–1370. doi: 10.1113/jphysiol.2009.170944.
- 1189 **Rotstein HG**. Spiking resonances in models with the same slow resonant and fast amplifying currents but  
1190 different subthreshold dynamic properties. *Journal of Computational Neuroscience*. 2017 Dec; 43(3):243–271.  
1191 doi: 10.1007/s10827-017-0661-9.
- 1192 **Rotstein HG**, Nadim F. Frequency preference in two-dimensional neural models: a linear analysis of the  
1193 interaction between resonant and amplifying currents. *Journal of Computational Neuroscience*. 2014 Aug;  
1194 37(1):9–28. doi: 10.1007/s10827-013-0483-3.
- 1195 **Schmidt SL**, Dorsett CR, Iyengar AK, Fröhlich F. Interaction of intrinsic and synaptic currents mediate network  
1196 resonance driven by layer V pyramidal cells. *Cerebral Cortex*. 2016; 27(9):4396–4410. doi: 10.1093/cer-  
1197 cor/bhw242.
- 1198 **Sekulić V**, Yi F, Garrett T, Guet-McCreight A, Lopez YY, Solis-Wheeler M, Wang R, Liu X, Lawrence JJ, Skinner  
1199 FK. Somatodendritic HCN channels in hippocampal OLM cells revealed by a convergence of computational  
1200 models and experiments. *BioRxiv*. 2019; p. 633941. doi: 10.1101/633941.
- 1201 **Sekulić V**, Skinner FK. Computational models of O-LM cells are recruited by low or high theta frequency inputs  
1202 depending on h-channel distributions. *eLife*. 2017 Mar; 6:e22962. doi: 10.7554/eLife.22962.
- 1203 **Shah MM**. Neuronal HCN channel function and plasticity. *Current Opinion in Physiology*. 2018; 2:92–97. doi:  
1204 10.1016/j.cophys.2018.01.001.
- 1205 **Shai AS**, Anastassiou CA, Larkum ME, Koch C. Physiology of layer 5 pyramidal neurons in mouse primary visual  
1206 cortex: coincidence detection through bursting. *PLoS computational biology*. 2015; 11(3):e1004090. doi:  
1207 10.1371/journal.pcbi.1004090.
- 1208 **Silva LR**, Amitai Y, Connors BW. Intrinsic oscillations of neocortex generated by layer 5 pyramidal neurons.  
1209 *Science*. 1991; 251(4992):432–435. doi: 10.1126/science.1824881.
- 1210 **Stark E**, Eichler R, Roux L, Fujisawa S, Rotstein HG, Buzsáki G. Inhibition-induced theta resonance in cortical  
1211 circuits. *Neuron*. 2013; 80(5):1263–1276. doi: 10.1016/j.neuron.2013.09.033.

- 1212 **Sun H, An S, Luhmann HJ, Kilb W.** Resonance properties of GABAergic interneurons in immature GAD67-GFP  
1213 mouse neocortex. *Brain research*. 2014; 1548:1–11. doi: [10.1016/j.brainres.2013.12.032](https://doi.org/10.1016/j.brainres.2013.12.032).
- 1214 **Sunkin SM, Ng L, Lau C, Dolbeare T, Gilbert TL, Thompson CL, Hawrylycz M, Dang C.** Allen Brain Atlas: an  
1215 integrated spatio-temporal portal for exploring the central nervous system. *Nucleic acids research*. 2012;  
1216 41(D1):D996–D1008. doi: [10.1093/nar/gks1042](https://doi.org/10.1093/nar/gks1042).
- 1217 **Testa-Silva G, Verhoog MB, Linaro D, de Kock CPJ, Baayen JC, Meredith RM, De Zeeuw CI, Giugliano M, Mansvelder**  
1218 **HD.** High Bandwidth Synaptic Communication and Frequency Tracking in Human Neocortex. *PLoS Biol*. 2014  
1219 Nov; 12(11):e1002007. doi: [10.1371/journal.pbio.1002007](https://doi.org/10.1371/journal.pbio.1002007).
- 1220 **Ting JT, Daigle TL, Chen Q, Feng G.** Acute brain slice methods for adult and aging animals: application of targeted  
1221 patch clamp analysis and optogenetics. In: *Patch-Clamp Methods and Protocols* Springer; 2014.p. 221–242. doi:  
1222 [10.1007/978-1-4939-1096-0\\_14](https://doi.org/10.1007/978-1-4939-1096-0_14).
- 1223 **Toledo-Rodriguez M, Blumenfeld B, Wu C, Luo J, Attali B, Goodman P, Markram H.** Correlation maps allow  
1224 neuronal electrical properties to be predicted from single-cell gene expression profiles in rat neocortex.  
1225 *Cerebral Cortex*. 2004; 14(12):1310–1327. doi: [10.1093/cercor/bhh092](https://doi.org/10.1093/cercor/bhh092).
- 1226 **Ulrich D.** Dendritic resonance in rat neocortical pyramidal cells. *Journal of neurophysiology*. 2002; 87(6):2753–  
1227 2759. doi: [10.1152/jn.2002.87.6.2753](https://doi.org/10.1152/jn.2002.87.6.2753).
- 1228 **Vaidya SP, Johnston D.** Temporal synchrony and gamma-to-theta power conversion in the dendrites of CA1  
1229 pyramidal neurons. *Nature Neuroscience*. 2013 Dec; 16(12):1812–1820. doi: [10.1038/nn.3562](https://doi.org/10.1038/nn.3562).
- 1230 **Vaz AP, Inati SK, Brunel N, Zaghoul KA.** Coupled ripple oscillations between the medial temporal lobe and  
1231 neocortex retrieve human memory. *Science*. 2019 Mar; 363(6430):975–978. doi: [10.1126/science.aau8956](https://doi.org/10.1126/science.aau8956).
- 1232 **Verhoog MB, Goriounova NA, Obermayer J, Stroeder J, Hjorth JJJ, Testa-Silva G, Baayen JC, Kock CPJd, Meredith**  
1233 **RM, Mansvelder HD.** Mechanisms Underlying the Rules for Associative Plasticity at Adult Human Neocortical  
1234 Synapses. *The Journal of Neuroscience*. 2013 Oct; 33(43):17197–17208. doi: [10.1523/JNEUROSCI.3158-](https://doi.org/10.1523/JNEUROSCI.3158-13.2013)  
1235 [13.2013](https://doi.org/10.1523/JNEUROSCI.3158-13.2013).
- 1236 **Wilson RI.** It takes all kinds to make a brain. *Nature Neuroscience*. 2010 Oct; 13(10):1158–1160. doi:  
1237 [10.1038/nn1010-1158](https://doi.org/10.1038/nn1010-1158).
- 1238 **Womelsdorf T, Valiante TA, Sahin NT, Miller KJ, Tiesinga P.** Dynamic circuit motifs underlying rhythmic gain  
1239 control, gating and integration. *Nature neuroscience*. 2014; 17(8):1031. doi: [10.1038/nn.3764](https://doi.org/10.1038/nn.3764).
- 1240 **Zemankovics R, Káli S, Paulsen O, Freund TF, Hájos N.** Differences in subthreshold resonance of hippocampal  
1241 pyramidal cells and interneurons: the role of h-current and passive membrane characteristics. *The Journal of*  
1242 *physiology*. 2010; 588(12):2109–2132. doi: [10.1113/jphysiol.2009.185975](https://doi.org/10.1113/jphysiol.2009.185975).
